# Supplementary material for: Quantitative Analysis of Glycerol Accumulation, Glycolysis and Growth under Hyper Osmotic Stress
Source: PLoS Comput Biol. 2013 Jun 6;9(6):e1003084. doi: 10.1371/journal.pcbi.1003084 (PMC3677637; doi:10.1371/journal.pcbi.1003084)
Supplement: Dataset S1 — Raw and processed metabolite measurements for different strains, stress 0.4 M NaCl added at t = 0. (XLS) [file pcbi.1003084.s001.xls]

## Sheet: Tabelle1
RAW DATA (g/l)
Fps1D1
min	OD	Trehalose_tot	Glucose_tot	Glycerol_tot	Ethanol_tot	Succinate_tot	Acetate_tot	Pyruvate_tot	Trehalose_ext	Glucose_ext	Glycerol_ext	Ethanol_ext	Succinate_ext	Acetate_ext	Pyruvate_ext	Trehalose_int	Glucose_int	Glycerol_int	Ethanol_int	Succinate_int	Acetate_int	Pyruvate_int
-60	0.61	0.0563	21.0515	0.2827	1.3695	0.1331	0.1704	0.0237	0.0557	21.1345	0.2271	1.3556	0.1324	0.162	0.0245	0.0005	0.1442	0.0027	NA	NA	NA	NA
-30	0.8	0.0571	19.8981	0.2415	1.7166	0.1335	0.1834	0.0236	0.0605	20.3976	0.2359	1.7043	0.1328	0.1727	0.0245	0.0006	0.2014	0.0041	0.2158	NA	0.0004	NA
-15	0.89	0.0563	19.4023	0.247	1.9031	0.1335	0.19	0.024	0.059	19.8734	0.2415	1.8976	0.1325	0.1788	0.0245	0.0005	0.1491	0.0035	0.1584	NA	0.0027	0.0006
0	0.99	0.0563	19.2767	0.253	2.1213	0.1335	0.1982	0.0243	0.061	19.3495	0.2459	2.1139	0.1324	0.1861	0.0249	0.0007	0.2018	0.0062	NA	NA	0.0019	0.0007
5	1.02	0.0506	17.3315	0.2358	2.0009	0.1209	0.1834	0.0284	0.0568	17.585	0.2303	1.9911	0.122	0.1752	0.0282	0.0006	0.1287	0.0049	NA	NA	0.0079	0.0006
10	1.09	0.0487	17.5033	0.2425	2.0305	0.1212	0.1873	0.0288	0.0573	17.2791	0.2357	2.0375	0.1217	0.178	0.0284	0.0009	0.1843	0.0057	0.1169	NA	0.0065	0.0007
15	1.07	0.051	17.0176	0.2514	2.0813	0.1213	0.1913	0.0288	0.0559	17.4005	0.244	2.0779	0.122	0.1807	0.0284	0.0011	0.1671	0.0081	NA	NA	0.0098	0.0007
20	1.08	0.052	17.2294	0.2641	2.1225	0.1212	0.1964	0.0289	0.0565	17.2503	0.2547	2.1209	0.1213	0.1844	0.0285	0.0013	0.1243	0.0112	0.6797	NA	0.0088	0.0006
30	1.14	0.0531	16.9238	0.4118	2.2103	0.1216	0.2063	0.0292	0.0553	16.7948	0.2856	2.2075	0.1219	0.1921	0.0284	0.0028	0.1353	0.0127	NA	NA	0.0101	0.0007
45	1.24	0.0534	16.3552	0.4874	2.3499	0.1217	0.2226	0.0303	0.0557	16.4667	0.4586	2.3487	0.1227	0.2094	0.0286	0.0056	0.2793	0.0266	0.0364	NA	0.0132	0.001
60	1.18	0.0574	15.8088	0.5802	2.508	0.1217	0.2377	0.0329	0.0529	15.7776	0.5401	2.5066	0.123	0.2248	0.0291	0.0071	0.1911	0.0373	NA	NA	0.0151	0.0012
90	1.4	0.0585	14.5453	0.7815	2.8506	0.1234	0.2665	0.0442	0.0538	14.6259	0.7289	2.8412	0.1241	0.2541	0.0365	0.0082	0.1484	0.0478	NA	NA	0.0131	0.0016
120	1.49	0.0593	13.2626	0.989	3.2222	0.1245	0.2971	0.055	0.0534	13.3319	0.9254	3.2931	0.1261	0.2829	0.046	0.0083	0.0933	0.0621	NA	NA	0.0155	0.0011
180	1.88	0.0612	10.3543	1.3765	4.0777	0.1251	0.3679	0.0656	0.0526	10.4263	1.2923	4.1826	0.1276	0.3542	0.0613	0.0104	0.1148	0.1015	0.4127	NA	0.0221	0.0013
221	2.13	0.0675	8.4248	1.5724	4.7372	0.1277	0.4271	0.069	0.0543	8.6475	1.4899	4.6382	0.1276	0.4071	0.064	0.0164	0.0918	0.0913	0.1435	NA	0.0206	0.0014
Gpd1D
Time	OD	Trehalose_tot	Glucose_tot	Glycerol_tot	Ethanol_tot	Succinate_tot	Acetate_tot	Pyruvate_tot	Trehalose_ext	Glucose_ext	Glycerol_ext	Ethanol_ext	Succinate_ext	Acetate_ext	Pyruvate_ext	Trehalose_int	Glucose_int	Glycerol_int	Ethanol_int	Succinate_int	Acetate_int	Pyruvate_int
-60	0.5	NA	20.103	0.1314	1.3362	0.0794	0.2244	0.0456	NA	20.2324	0.1316	1.3312	0.0742	0.2054	0.045	NA	NA	NA	NA	NA	NA	NA
-30	0.68	NA	19.3298	0.1358	1.6364	0.0766	0.2318	0.0456	NA	19.4586	0.1356	1.6438	0.0722	0.2108	0.0454	NA	NA	NA	NA	NA	NA	NA
-15	0.75	NA	19.0754	0.1388	1.832	0.0776	0.2426	0.0464	NA	19.2614	0.1394	1.849	0.078	0.2346	0.0468	NA	NA	NA	NA	NA	NA	NA
0	0.83	NA	18.6338	0.14	2.0252	0.077	0.2476	0.047	NA	18.9038	0.142	2.033	0.0776	0.2088	0.0476	NA	NA	NA	NA	NA	NA	NA
5	0.84	NA	17.0256	0.1306	1.9084	0.0704	0.2324	0.044	NA	17.2558	0.1304	1.9188	0.076	0.2236	0.044	NA	NA	NA	NA	NA	NA	NA
10	0.84	NA	16.8582	0.1314	1.9488	0.0714	0.2316	0.044	NA	16.8614	0.1284	1.9446	0.0722	0.2274	0.0434	NA	NA	NA	NA	NA	NA	NA
15	0.86	NA	16.9	0.1344	2.0138	0.0746	0.2362	0.0448	NA	17.0038	0.129	1.9988	0.0714	0.233	0.0438	NA	NA	NA	NA	NA	NA	NA
20	0.86	NA	16.5934	0.134	2.0282	0.0742	0.239	0.044	NA	16.886	0.131	2.0434	0.0736	0.2336	0.044	NA	NA	NA	NA	NA	NA	NA
30	0.91	NA	16.5504	0.1374	2.1418	0.0762	0.2504	0.045	NA	16.6534	0.1316	2.1564	0.0718	0.2406	0.044	NA	NA	NA	NA	NA	NA	NA
45	0.92	NA	15.98	0.141	2.2876	0.0728	0.2582	0.0446	NA	16.1114	0.1264	2.2804	0.0722	0.2506	0.0436	NA	NA	NA	NA	NA	NA	NA
60	0.96	NA	15.5916	0.147	2.4234	0.0736	0.276	0.0456	NA	15.659	0.1218	2.454	0.0724	0.2664	0.044	NA	NA	NA	NA	NA	NA	NA
90	1.09	NA	14.6882	0.1458	2.8434	0.0696	0.3624	0.0396	NA	14.8044	0.1124	2.8528	0.0656	0.26	0.0374	NA	NA	NA	NA	NA	NA	NA
120	1.3	NA	13.7844	0.1566	3.2788	0.07	0.3832	0.0412	NA	13.8708	0.1154	3.285	0.069	0.3626	0.0398	NA	NA	NA	NA	NA	NA	NA
180	1.85	NA	11.524	0.1698	4.2876	0.071	0.435	0.0456	NA	11.5322	0.1132	4.7588	0.0718	0.421	0.044	NA	NA	NA	NA	NA	NA	NA
207	2.03	NA	10.7164	0.1726	4.6316	0.07	0.4638	0.0474	NA	8.5122	0.0916	3.8512	0.0532	0.351	0.0358	NA	NA	NA	NA	NA	NA	NA
Hog1-att
min	OD	Trehalose_tot	Glucose_tot	Glycerol_tot	Ethanol_tot	Succinate_tot	Acetate_tot	Pyruvate_tot	Trehalose_ext	Glucose_ext	Glycerol_ext	Ethanol_ext	Succinate_ext	Acetate_ext	Pyruvate_ext	Trehalose_int	Glucose_int	Glycerol_int	Ethanol_int	Succinate_int	Acetate_int	Pyruvate_int
-60	0.38	NA	NA	NA	NA	NA	NA	NA	0.0553	19.5239	0.1922	0.8522	0.1209	0.1179	0.0335	0.0004	0.2128	0.0031	NA	NA	0.0037	0.0447
-30	0.49	0.0547	18.913	0.1972	1.0955	0.1204	0.1321	0.0323	0.0504	19.0031	0.1967	1.0872	0.1237	0.1304	0.0327	0.0006	0.1946	0.0033	0.1984	NA	0.0038	0.0417
-15	0.5	0.0536	18.6591	0.2	1.23	0.122	0.1391	0.0311	0.0562	18.7886	0.1992	1.2264	0.1235	0.1326	0.032	0.0007	0.1921	0.0035	NA	NA	0.0052	0.0007
0	0.57	0.0588	18.414	0.2032	1.3676	0.1222	0.1439	0.0312	0.0571	18.4095	0.2024	1.3663	0.1233	0.1372	0.0323	0.0009	0.279	0.0037	0.1444	NA	0.0061	0.0008
5	0.57	0.0542	16.8775	0.1876	1.2847	0.112	0.1334	0.0381	0.0529	16.9801	0.1852	1.2893	0.1135	0.1276	0.0388	0.0006	0.1637	0.0055	NA	NA	0.005	0.0007
10	0.59	0.0538	16.5089	0.1905	1.3133	0.1116	0.1359	0.0381	0.0497	16.841	0.1857	1.3183	0.1134	0.1311	0.0389	0.0007	0.1678	0.0081	NA	NA	0.0044	0.0007
15	0.59	0.0535	16.2731	0.1927	1.3484	0.1108	0.1363	0.0383	0.0506	16.735	0.1865	1.345	0.1135	0.1325	0.0387	0.0007	0.1442	0.0092	NA	NA	0.0072	0.0007
20	0.59	0.0526	16.2403	0.1973	1.3823	0.1112	0.1403	0.0385	0.0488	16.6225	0.1875	1.3778	0.1134	0.135	0.0387	0.0009	0.1838	0.0132	NA	NA	0.0072	0.0008
30	0.61	0.0539	16.4136	0.2089	1.4451	0.1123	0.1458	0.0386	0.0493	16.3298	0.1904	1.4359	0.1147	0.1378	0.0387	0.0011	0.1392	0.0239	NA	NA	0.0061	0.0007
45	0.63	0.0527	15.7534	0.2271	1.537	0.112	0.1526	0.0387	0.0549	15.98	0.1974	1.5403	0.1144	0.1461	0.0389	0.0014	0.1767	0.0383	NA	NA	0.0062	0.0008
60	0.66	0.0513	15.7894	0.2473	1.6629	0.112	0.1592	0.0395	0.0502	15.5484	0.206	1.6596	0.1142	0.1525	0.0391	0.0011	0.202	0.0489	NA	NA	0.0087	0.0009
90	0.81	0.0504	14.992	0.3801	1.9233	0.1119	0.1748	0.0406	0.0528	14.8728	0.2299	1.9879	0.1143	0.1669	0.0401	0.0008	0.1588	0.0666	0.0397	n.a.	0.0079	0.0008
120	0.85	0.0519	14.265	0.4262	2.2034	0.1123	0.1942	0.0426	0.0535	14.3778	0.262	2.1723	0.1153	0.1827	0.0415	0.0008	0.139	0.0735	0.2072	n.a.	0.0099	0.0008
180	1.19	0.0532	12.3603	0.5195	2.9317	0.1124	0.2318	0.0476	0.0548	12.5159	0.4436	2.9441	0.1142	0.2205	0.0461	0.0012	0.1242	0.0873	0.0505	n.a.	0.0137	0.001
202	1.34	0.0517	11.535	0.5542	3.1497	0.1113	0.246	0.0483	0.0545	11.762	0.4782	3.1521	0.1147	0.235	0.0474	0.0016	0.1248	0.0868	0.0379	n.a.	0.0163	0.001
Hog1D
min	OD	Trehalose_tot	Glucose_tot	Glycerol_tot	Ethanol_tot	Succinate_tot	Acetate_tot	Pyruvate_tot	Trehalose_ext	Glucose_ext	Glycerol_ext	Ethanol_ext	Succinate_ext	Acetate_ext	Pyruvate_ext	Trehalose_int	Glucose_int	Glycerol_int	Ethanol_int	Succinate_int	Acetate_int	Pyruvate_int
-60	0.61	0.0624505	20.2867	0.2634	1.3837	0.1992	0.1608	0.0219	0.0601377	20.2936	0.2558	1.3692	0.1926	0.1539	0.021	0.00075472	0.1477	0.0031	0.0146	0	0.0082	0.0005
-30	0.77	0.061503	19.3301	0.2664	1.7232	0.1926	0.1714	0.0218	0.0605739	19.5754	0.2624	1.7142	0.1878	0.1663	0.0214	0.00092944	0.1976	0.0039	0.0244	0	0.0101	0.0007
-15	0.93	0.0616822	18.9197	0.2686	1.9215	0.19	0.1793	0.022	0.0603846	19.1051	0.2668	1.9108	0.1862	0.1722	0.0218	0.00083256	0.1471	0.0034	0.1941	0	0.0092	0.0007
0	0.97	0.0614778	18.4148	0.2717	2.1034	0.1888	0.1816	0.0221	0.0612431	18.5606	0.2691	2.1273	0.1834	0.1785	0.0219	0.00095352	0.1816	0	0	0	0	0.0007
5	0.97	0.058988	16.6993	0.253	2.1061	0.1716	0.172	0.0288	0.0583054	16.8661	0.2486	2.0021	0.169	0.167	0.0289	0.00100112	0.1649	0.005	0.0045	0	0	0.0007
10	1.05	0.0589617	16.4912	0.2554	2.0481	0.1709	0.1739	0.0289	0.0578086	16.6849	0.2484	2.0395	0.1663	0.1704	0.029	0.00118872	0.1741	0.0091	0.0229	0	0.0083	0.0007
15	1.06	0.0591913	16.3945	0.2591	2.0884	0.172	0.1787	0.0291	0.0571288	16.5191	0.2471	2.0703	0.1654	0.1726	0.0289	0.0012884	0.1687	0.0119	0.2796	0	0.0102	0.0007
20	1	0.0590143	16.3536	0.2635	2.1134	0.1717	0.1827	0.0296	0.0572906	16.4706	0.2506	2.2029	0.1675	0.1766	0.0293	0.00145752	0.1839	0.0159	0.2305	0	0.0089	0.0007
30	1.03	0.0587237	16.1481	0.2723	2.2282	0.1712	0.1868	0.0298	0.0580405	16.2357	0.2554	2.213	0.1659	0.1828	0.0296	0.0018176	0.2045	0.0222	0.1599	0	0.0105	0.0008
45	1.04	0.058983	15.6675	0.2861	2.4592	0.1702	0.1941	0.0301	0.0573612	15.8924	0.2615	2.3493	0.1638	0.1911	0.03	0.00200072	0.1482	0.0303	0.2062	0	0.0103	0.0008
60	1.15	0.0591526	15.2545	0.3033	2.4575	0.1673	0.2008	0.0307	0.058027	15.5376	0.271	2.5022	0.1664	0.1998	0.0305	0.00218272	0.157	0.0396	0.134	0	0.0123	0.0008
90	1.25	0.0596908	14.5499	0.3399	2.7668	0.1687	0.2295	0.0319	0.0584689	14.731	0.2977	2.7913	0.1648	0.222	0.0316	0.00203992	0.1107	0.0492	0.4011	0	0.0132	0.0007
120	1.32	0.0596006	13.787	0.3821	3.0969	0.1644	0.2584	0.0338	0.0585971	13.9005	0.3329	3.0692	0.1639	0.2494	0.0332	0.00220792	0.155	0.0568	0.2686	0	0.0164	0.0008
180	1.53	0.0614839	11.913	0.4718	3.7222	0.1608	0.31	0.0378	0.0581676	12.1191	0.4195	3.6941	0.1581	0.2993	0.0373	0.004052	0.1351	0.0595	0.1747	0	0.0178	0.0009
209	1.66	0.0638303	11.1733	0.5056	3.9995	0.1571	0.3386	0.0398	0.0576899	11.3188	0.4574	4.0122	0.1595	0.3376	0.0394	0.00571856	0.1098	0.0556	0.0357	0	0.0063	0.001
NoStress1
Time	OD	Trehalose_tot	Glucose_tot	Glycerol_tot	Ethanol_tot	Succinate_tot	Acetate_tot	Pyruvate_tot	Trehalose_ext	Glucose_ext	Glycerol_ext	Ethanol_ext	Succinate_ext	Acetate_ext	Pyruvate_ext	Trehalose_int	Glucose_int	Glycerol_int	Ethanol_int	Succinate_int	Acetate_int	Pyruvate_int
-60	0.63	NA	17.1682	0.1338	1.3736	0.0896	0.249	0.0392	NA	16.9758	0.1426	1.3924	0.0888	0.2516	0.0376	NA	NA	NA	NA	NA	NA	NA
-30	0.8	NA	16.429	0.1384	1.6854	0.0924	0.2614	0.0396	NA	16.1786	0.146	1.7066	0.0894	0.259	0.0382	NA	NA	NA	NA	NA	NA	NA
-15	0.84	NA	15.877	0.1406	1.8816	0.0902	0.2684	0.0402	NA	15.7982	0.1482	1.9016	0.0898	0.267	0.0388	NA	NA	NA	NA	NA	NA	NA
0	0.96	NA	15.4196	0.1438	2.09	0.0896	0.2776	0.0408	NA	15.4096	0.1408	2.08	0.0876	0.2756	0.04	NA	NA	NA	NA	NA	NA	NA
5	1.02	NA	15.3372	0.1546	2.2004	0.0858	0.288	0.0406	NA	15.3072	0.1486	2.1704	0.0818	0.283	0.0405	NA	NA	NA	NA	NA	NA	NA
10	1.06	NA	15.2056	0.1556	2.3008	0.0854	0.2908	0.0406	NA	15.2042	0.1564	2.3362	0.0924	0.2802	0.041	NA	NA	NA	NA	NA	NA	NA
15	1.05	NA	14.8952	0.1444	2.2888	0.0916	0.283	0.0404	NA	14.8552	0.1424	2.2858	0.0913	0.28	0.0401	NA	NA	NA	NA	NA	NA	NA
20	1.1	NA	14.9778	0.1592	2.4506	0.0926	0.297	0.0414	NA	14.9578	0.1542	2.442	0.0916	0.294	0.0411	NA	NA	NA	NA	NA	NA	NA
30	1.19	NA	14.6246	0.1616	2.6234	0.0872	0.303	0.042	NA	14.9442	0.1628	2.6648	0.0906	0.2956	0.0428	NA	NA	NA	NA	NA	NA	NA
45	1.27	NA	13.9246	0.1638	2.8718	0.0862	0.3138	0.0422	NA	14.3816	0.166	2.9238	0.0932	0.3086	0.0452	NA	NA	NA	NA	NA	NA	NA
60	1.4	NA	13.3384	0.1668	3.1354	0.093	0.3276	0.0432	NA	13.4838	0.1678	3.132	0.0944	0.3166	0.046	NA	NA	NA	NA	NA	NA	NA
90	1.69	NA	12.1378	0.167	3.6786	0.0862	0.4052	0.0382	NA	12.0612	0.16	3.6134	0.0858	0.3982	0.0376	NA	NA	NA	NA	NA	NA	NA
120	2.07	NA	10.9694	0.1736	4.1006	0.084	0.4332	0.0398	NA	11.049	0.1692	4.1226	0.0838	0.4278	0.0404	NA	NA	NA	NA	NA	NA	NA
180	2.48	NA	8.6458	0.1826	4.9318	0.093	0.3848	0.0442	NA	8.7494	0.1836	5.0558	0.0896	0.4642	0.0492	NA	NA	NA	NA	NA	NA	NA
200	3.08	NA	7.9022	0.1916	5.4244	0.0912	0.4884	0.0524	NA	8.091	0.1926	5.477	0.093	0.4854	0.054	NA	NA	NA	NA	NA	NA	NA
NoStress2
min	OD	Trehalose_tot	Glucose_tot	Glycerol_tot	Ethanol_tot		Acetate_tot	Pyruvate_tot	Trehalose_ext	Glucose_ext	Glycerol_ext	Ethanol_ext		Acetate_ext		Trehalose_int	Glucose_int	Glycerol_int	Ethanol_int		Acetate_int	Pyruvate_int
-60	0.42	0.0594	21.7818	0.2126	0.9993		0.1631	0.0301	0.0573	21.9208	0.2125	1.0418		0.1592		0.0005	0.1624	0.0023				0.0003
-30	0.544	0.0568	21.0791	0.2177	1.3011		0.1719	0.0295	0.0577	21.1711	0.2162	1.2281		0.1616		0.0004	0.1639	0.0027				0.0004
-15	0.608	0.0574	20.5773	0.2201	1.4517		0.1773	0.0301	0.0578	20.8061	0.2194	1.4551		0.1708		0.0005	0.1691	0.0033				0.0005
0	0.75	0.0571	20.1661	0.2227	1.6152		0.1824	0.0298	0.0574	20.079	0.2229	1.6031		0.177		0.0006	0.2073	0.0035	0.169			0.0005
5	0.7	0.0537	18.4695	0.2088	1.5561		0.1718	0.0274	0.0526	18.7607	0.2079	1.624		0.1668		0.0005	0.1409	0.0034	0.0339			0.0004
10	0.715	0.0518	18.4403	0.2095	1.5425		0.1754	0.0278	0.0526	18.5497	0.2084	1.6095		0.1664		0.0005	0.1396	0.0033	0.0473			0.0004
15	0.755	0.0512	18.3335	0.2104	1.6621		0.1758	0.0278	0.053	18.0281	0.2084	1.6625		0.1691		0.0006	0.1737	0.0035	0.0183			0.0005
20	0.845	0.0517	18.1198	0.2111	1.7373		0.1794	0.0278	0.0528	18.2362	0.2116	1.7366		0.171		0.001	0.3278	0.0054	0.0638			0.0007
30	0.89	0.052	17.8179	0.2131	1.8435		0.1836	0.0284	0.0528	17.9717	0.2136	1.8401		0.177		0.0006	0.1433	0.0035				0.0005
45	1.01	0.0532	16.741	0.2163	2.0267		0.1899	0.028	0.0524	17.4326	0.2178	2.0381		0.1837		0.0007	0.1743	0.0039	0.152			0.0006
60	1.08	0.0518	16.1488	0.221	2.2506		0.1989	0.0281	0.0515	16.7507	0.2206	2.232		0.1898		0.0007	0.1905	0.0045	0.1678			0.0007
90	1.36	0.0526	15.1139	0.2287	2.6631		0.2159	0.0294	0.0533	15.4483	0.2285	2.7077		0.209		0.0007	0.1704	0.0042				0.0007
120	1.73	0.0538	13.9752	0.2385	3.2065		0.2416	0.0305	0.0516	14.1022	0.2377	3.2619		0.2328		0.0011	0.114	0.0055	0.1278			0.0008
180	2.2	0.0552	11.5876	0.2559	4.0599		0.284	0.035	0.0525	11.7425	0.2559	4.0661		0.279		0.0019	0.0832	0.0051	0.0474			0.0012
Pfk2627D
min	OD	Trehalose_tot	Glucose_tot	Glycerol_tot	Ethanol_tot	Succinate_tot	Acetate_tot	Pyruvate_tot	Trehalose_ext	Glucose_ext	Glycerol_ext	Ethanol_ext	Succinate_ext	Acetate_ext	Pyruvate_ext	Trehalose_int	Glucose_int	Glycerol_int	Ethanol_int	Succinate_int	Acetate_int	Pyruvate_int
-60	0.4	0.0622478	21.7422	0.2273	0.555	0.214	0.1407	0.0186	0.0626308	22.2482	0.2318	0.5678	0.2144	0.14	0.0185	0.00096248	0.2324	0.0034	0.2875	0	0	0.0004
-30	0.47	0.0567318	19.541	0.2107	0.6783	0.1936	0.1359	0.017	0.0618714	21.7399	0.2318	0.7134	0.2111	0.1447	0.0183	0.00071608	0.1372	0	0.3236	0	0	0.0003
-15	0.55	0.0572817	19.5308	0.2142	0.7375	0.1922	0.1406	0.0172	0.06169	21.3835	0.2312	0.8	0.2086	0.1474	0.0182	0.00079056	0.161	0	0	0	0	0.0004
0	0.6	0.0634758	20.9885	0.2353	0.8921	0.2106	0.1566	0.0188	0.0621386	21.1412	0.2339	0.8976	0.204	0.1518	0.0184	0.00096416	0.2088	0.0034	0.2038	0	0.0082	0.0004
5	0.59	0.0595262	18.9264	0.2122	0.82	0.1892	0.1419	0.0218	0.0598672	19.3345	0.216	0.8429	0.1902	0.1396	0.0215	0.00092216	0.1589	0.0047	0.0092	0	0.0081	0.0004
10	0.64	0.0599848	19.1986	0.2174	0.8529	0.1919	0.1475	0.0221	0.0597065	19.278	0.2163	0.8603	0.1881	0.1429	0.0217	0.00124584	0.2163	0.0055	0	0	0	0.0005
15	0.62	0.0600072	19.2262	0.219	0.8771	0.1913	0.1496	0.0223	0.058657	19.2328	0.214	0.8761	0.1893	0.1459	0.0217	0.0012268	0.1512	0.0077	0.1844	0	0	0.0005
20	0.65	0.0596779	19.178	0.2216	0.8956	0.1922	0.1504	0.0223	0.0590132	19.2606	0.2158	0.8987	0.1903	0.1478	0.0219	0.00157624	0.1638	0	0	0	0	0.0004
30	0.59	0.00720648	NA	NA	NA	NA	NA	NA	0.0595525	19.0243	0.2173	0.9359	0.1897	0.1536	0.022	0.00256968	0.1392	0.0186	0	0	0	0.0005
45	0.67	0.0629461	18.8205	0.254	0.9874	0.1915	0.17	0.0232	0.0595295	18.8969	0.2179	1.0093	0.1898	0.1622	0.0223	0.00403632	0.1528	0.0425	0.0124	0	0.0104	0.0006
60	0.66	0.0613148	18.0646	0.2698	1.0589	0.1867	0.1742	0.0233	0.0586089	18.6175	0.2242	1.095	0.1894	0.1717	0.0228	0.003618	0.1521	0.0593	0.3112	0	0.0102	0.0007
90	0.77	0.0609962	17.9279	0.315	1.2888	0.1903	0.2	0.0255	0.0594769	18.0039	0.2429	1.2798	0.1867	0.1898	0.0242	0.00246552	0.1802	0.0762	0	0	0	0.0006
120	0.85	0.0599148	17.3018	0.3533	1.519	0.1879	0.2182	0.0272	0.060519	17.4867	0.272	1.5151	0.1873	0.2113	0.0262	0.00179184	0.1567	0.0919	0.1625	0	0.015	0.0007
180	1.23	0.0617835	15.7188	0.4542	2.1341	0.1843	0.2719	0.0318	0.0597406	15.7587	0.3424	2.0923	0.1826	0.2555	0.0305	0.0027836	0.1966	0.1215	0.0222	0	0.0136	0.0009
206	1.45	0.062222	14.8354	0.4958	2.4173	0.1817	0.2977	0.0337	0.0568342	14.3574	0.3624	2.2793	0.1693	0.2714	0.0314	0.003422	0.1496	0.1317	0	0	0.0213	0.0008
WT1
min	OD	Trehalose_tot	Glucose_tot	Glycerol_tot	Ethanol_tot	Succinate_tot	Acetate_tot	Pyruvate_tot	Trehalose_ext	Glucose_ext	Glycerol_ext	Ethanol_ext	Succinate	Acetate_ext	Pyruvate_ext	Trehalose_int	Glucose_int	Glycerol_int	Ethanol_int	Succinate_int	Acetate_int	Pyruvate_int
-30	0.88	NA	15.9169	0.175622	2.11326	0.57072	0.090497	0.041382	NA	15.8161	0.169803	2.08843	0.560297	0.0781704	0.0474764	NA	0.13712	0.00252715	0.049852	0	0.015148	0.00106047
-15	1.01	NA	15.4129	0.174388	2.30677	0.546454	0.0916624	0.0406868	NA	15.381	0.175583	2.31855	0.554935	0.0875193	0.0482354	NA	0.100944	0.00137037	0.152419	0.00364224	0.0140938	0.000605977
0	1.08	NA	14.9174	0.177918	2.55599	0.542477	0.101926	0.0402514	NA	14.8671	0.176167	2.54131	0.557952	0.0890416	0.0492892	NA	0.245015	0.00539379	0.106159	0.00846127	0.0207678	0.000892914
5	1.02	NA	13.5767	0.171197	2.45224	0.515767	0.0952838	0.0461955	NA	13.4791	0.16261	2.42127	0.525341	0.0848352	0.0454354	NA	0.0773809	0.00265283	0	0.0026958	0	0.000684332
10	1.04	NA	13.2627	0.171052	2.5215	0.521697	0.10142	0.0464147	NA	13.3004	0.163222	2.47922	0.523698	0.090946	0.0453193	NA	0.107989	0.0089716	0.0255166	0.00370455	0.0111343	0.000704136
15	1.08	NA	13.3681	0.164397	2.42146	0.521817	0.0969421	0.0461588	NA	13.2126	0.163094	2.53435	0.529998	0.0939957	0.0456786	NA	0.0780812	0.0122282	0.116448	0.00243714	0.00939847	0.000687988
20	1.08	NA	13.05	0.176154	2.53331	0.521226	0.107187	0.0462486	NA	13.0902	0.167262	2.56076	0.530391	0.0950504	0.0458139	NA	0.103366	0.0204899	0.0284652	0.00367502	0.00821272	0.000821296
30	1.04	NA	12.7113	0.198308	2.67974	0.521094	0.111603	0.0469156	NA	12.6354	0.157134	2.60857	0.527131	0.100526	0.04572	NA	0.101932	0.0381544	0.145218	0.00393385	0.0186095	0.000865788
45	1.13	NA	12.151	0.235751	2.87285	0.524808	0.124582	0.0501976	NA	12.2037	0.181266	2.8733	0.529443	0.110824	0.0475105	NA	0.143173	0.0564678	0.111198	0.00599847	0.0100959	0.000920609
60	1.14	NA	11.6015	0.258273	3.09897	0.523203	0.321037	0.0532652	NA	11.6664	0.198797	3.10861	0.532662	0.30679	0.0499623	NA	0.0692474	0.0608512	0.118186	0.00307497	0.0129292	0.000880993
90	1.46	NA	10.513	0.307769	3.37222	0.53269	0.35031	0.0585564	NA	10.1758	0.224959	3.51779	0.532729	0.332946	0.0543342	NA	0.0710192	0.0787149	0.127395	0.00354763	0.0174541	0.000882193
120	1.78	NA	9.30648	0.327016	3.9741	0.524069	0.388804	0.0594856	NA	9.37842	0.269182	4.02663	0.533777	0.381827	0.0578739	NA	0.0988757	0.0777089	0.158856	0.00476358	0.0246539	0.00100855
180	2.08	NA	7.48901	0.391816	4.84288	0.53959	0.450043	0.0654885	NA	7.51609	0.327344	4.68537	0.533933	0.446113	0.0622892	NA	0.0786171	0.0712599	0.136797	0.00491107	0.0178763	0.00115334
WT2
Time	OD	Trehalose_tot	Glucose_tot	Glycerol_tot	Ethanol_tot	Succinate_tot	Acetate_tot	Pyruvate_tot	Trehalose_ext	Glucose_ext	Glycerol_ext	Ethanol_ext	Succinate_ext	Acetate_ext	Pyruvate_ext	Trehalose_int	Glucose_int	Glycerol_int	Ethanol_int	Succinate_int	Acetate_int	Pyruvate_int
-60	0.5	NA	17.6132	0.1442	1.2038	0.084	0.069	0.039	NA	17.6592	0.1338	1.174	0.079	0.0674	0.0368	NA	NA	NA	NA	NA	NA	NA
-30	0.66	NA	16.9606	0.1482	1.812	0.087	0.078	0.0394	NA	16.8928	0.1468	1.801	0.092	0.074	0.0376	NA	NA	NA	NA	NA	NA	NA
-15	0.73	NA	16.1986	0.1358	1.5776	0.0872	0.0808	0.0394	NA	16.8722	0.15	1.9538	0.0878	0.0798	0.0386	NA	NA	NA	NA	NA	NA	NA
0	0.78	NA	16.123	0.1502	2.1474	0.0882	0.0854	0.04	NA	16.2614	0.1506	2.1342	0.0936	0.0832	0.0388	NA	NA	NA	NA	NA	NA	NA
5	0.8	NA	14.6204	0.142	1.765	0.0824	0.0842	0.0374	NA	14.637	0.1384	2.0146	0.0932	0.0818	0.0356	NA	NA	NA	NA	NA	NA	NA
10	0.8	NA	14.4506	0.1416	2.0382	0.0908	0.0874	0.0372	NA	14.7888	0.1396	1.9404	0.0926	0.0812	0.0356	NA	NA	NA	NA	NA	NA	NA
15	0.81	NA	14.2282	0.1472	2.1046	0.0868	0.088	0.0374	NA	14.6358	0.1438	2.1154	0.0888	0.0862	0.0368	NA	NA	NA	NA	NA	NA	NA
20	0.84	NA	14.1554	0.154	2.159	0.0854	0.0904	0.0374	NA	14.5866	0.1408	2.152	0.0868	0.086	0.0358	NA	NA	NA	NA	NA	NA	NA
30	0.82	NA	13.933	0.1696	2.2444	0.082	0.0964	0.038	NA	13.9125	0.140544	2.18419	0.0896256	0.0905472	0.0352512	NA	NA	NA	NA	NA	NA	NA
45	0.88	NA	13.5398	0.1906	2.3394	0.0844	0.097	0.039	NA	13.5394	0.1572	2.1922	0.0942	0.0946	0.0388	NA	NA	NA	NA	NA	NA	NA
60	0.92	NA	13.1526	0.2136	2.5516	0.0846	0.1084	0.0406	NA	13.1267	0.161971	2.46456	0.0881342	0.104993	0.0375584	NA	NA	NA	NA	NA	NA	NA
90	1.08	NA	11.974	0.253	2.912	0.0818	0.1306	0.0448	NA	12.592	0.1996	2.9082	0.0902	0.1262	0.0428	NA	NA	NA	NA	NA	NA	NA
120	1.24	NA	11.0014	0.299	3.352	0.0872	0.146	0.0494	NA	11.572	0.2226	3.0474	0.0878	0.1332	0.0476	NA	NA	NA	NA	NA	NA	NA
180	2	NA	9.0958	0.37	4.1322	0.0832	0.1806	0.0536	NA	9.3274	0.2962	3.763	0.0852	0.167	0.0526	NA	NA	NA	NA	NA	NA	NA
206	2.04	NA	8.0564	0.3878	4.3848	0.081	0.2018	0.0552	NA	8.4518	0.3292	4.3526	0.0812	0.1918	0.054	NA	NA	NA	NA	NA	NA	NA
WT3
Time	OD	Trehalose_tot	Glucose_tot	Glycerol_tot	Ethanol_tot	Succinate_tot	Acetate_tot	Pyruvate_tot	Trehalose_ext	Glucose_ext	Glycerol_ext	Ethanol_ext	Succinate_ext	Acetate_ext	Pyruvate_ext	Trehalose_int	Glucose_int	Glycerol_int	Ethanol_int	Succinate_int	Acetate_int	Pyruvate_int
-60	0.54	NA	19.5288	0.1494	1.3188	0.0736	0.051	0.046	NA	19.881	0.1516	1.2988	0.0778	0.0498	0.0454	NA	NA	NA	NA	NA	NA	NA
-30	0.67	NA	18.9812	0.1556	1.6074	0.0794	0.0578	0.0464	NA	19.2302	0.1564	1.621	0.0722	0.0542	0.0186	NA	NA	NA	NA	NA	NA	NA
-15	0.79	NA	18.9728	0.1542	1.7218	0.0842	0.0672	0.0482	NA	18.9724	0.1626	1.8208	0.0772	0.0604	0.0458	NA	NA	NA	NA	NA	NA	NA
0	0.85	NA	17.85	0.1498	1.9142	0.084	0.067	0.0464	NA	18.3356	0.1498	2.1734	0.0742	0.0636	0.0468	NA	NA	NA	NA	NA	NA	NA
5	0.89	NA	16.4796	0.1494	1.8972	0.0756	0.0702	0.044	NA	16.8336	0.1494	1.9008	0.0754	0.0638	0.0432	NA	NA	NA	NA	NA	NA	NA
10	0.89	NA	16.3778	0.1546	1.9316	0.0698	0.07	0.0444	NA	16.5332	0.1504	1.912	0.0738	0.0676	0.0434	NA	NA	NA	NA	NA	NA	NA
15	0.87	NA	16.2794	0.1596	1.9626	0.0698	0.0746	0.0444	NA	16.655	0.151	2.2342	0.0784	0.0702	0.0438	NA	NA	NA	NA	NA	NA	NA
20	0.9	NA	16.032	0.1554	1.9698	0.0766	0.0776	0.0444	NA	16.3392	0.1506	1.9814	0.079	0.0708	0.0432	NA	NA	NA	NA	NA	NA	NA
30	0.9	NA	15.9282	0.1902	2.0852	0.0744	0.0838	0.0468	NA	16.0182	0.1448	2.0758	0.0726	0.0756	0.0434	NA	NA	NA	NA	NA	NA	NA
45	0.9	NA	15.2584	0.2126	2.2914	0.076	0.0948	0.0464	NA	15.8044	0.1696	2.2972	0.0788	0.0826	0.0454	NA	NA	NA	NA	NA	NA	NA
60	0.98	NA	15.1792	0.2442	2.4374	0.0768	0.0996	0.0506	NA	15.0676	0.181	2.746	0.0772	0.0926	0.0462	NA	NA	NA	NA	NA	NA	NA
90	1.14	NA	13.79	0.2704	2.857	0.0774	0.1164	0.053	NA	14.1996	0.2204	3.2178	0.0776	0.108	0.0512	NA	NA	NA	NA	NA	NA	NA
120	1.35	NA	13.0316	0.3418	3.3266	0.0736	0.1412	0.0596	NA	12.7032	0.2456	3.5462	0.0732	0.1306	0.0548	NA	NA	NA	NA	NA	NA	NA
180	2.04	NA	10.434	0.4088	4.598	0.072	0.1854	0.0626	NA	10.5308	0.3348	4.5932	0.0662	0.1792	0.0612	NA	NA	NA	NA	NA	NA	NA
206	2.14	NA	9.8982	0.448	4.5132	0.075	0.2122	0.067	NA	9.6476	0.3604	4.9616	0.0788	0.1944	0.0632	NA	NA	NA	NA	NA	NA	NA
WT4
min	OD	Trehalose_tot	Glucose_tot	Glycerol_tot	Ethanol_tot		Acetate_tot	Pyruvate_tot	Trehalose_ext	Glucose_ext	Glycerol_ext	Ethanol_ext		Acetate_ext		Trehalose_int	Glucose_int	Glycerol_int	Ethanol_int		Acetate_int	Pyruvate_int
-60	0.544	0.056	21.0837	0.2303	1.2322		0.1732	0.0319	0.0572	21.1758	0.2301	1.3108		0.1689		0.0006	0.1689	0.0036				0.0003
-30	0.692	0.0585	20.3553	0.238	1.6003		0.1874	0.0319	0.0564	20.294	0.235	1.6701		0.1789		0.0006	0.1613	0.0039	0.1926			0.0004
-15	0.84	0.0584	19.7547	0.2409	1.7901		0.1941	0.0319	0.0572	19.9367	0.2403	1.7916		0.1867		0.0005	0.121	0.0036				0.0005
0	0.94	0.0569	19.3136	0.2457	1.9805		0.203	0.0325	0.0575	19.1119	0.2402	1.9764		0.1913		0.0007	0.1898	0.0046	0.1511			0.0006
5	0.972	0.0544	17.6832	0.232	1.8858		0.1888	0.0362	0.0527	17.404	0.2262	1.889		0.1818		0.0005	0.1235	0.0076	0.2019			0.0005
10	0.916	0.0529	17.4765	0.238	1.928		0.1929	0.0366	0.0544	17.2649	0.2271	1.936		0.1848		0.0008	0.128	0.0148	0.2234			0.0006
15	0.96	0.0548	17.4326	0.2479	1.977		0.1976	0.0367	0.0542	17.4208	0.2274	1.9777		0.1873		0.001	0.1571	0.0242	0.0609			0.0007
20	0.968	0.0537	17.2183	0.2603	2.0206		0.2009	0.0367	0.054	16.8835	0.2298	2.0235		0.1902		0.0015	0.1505	0.036	0.1182			0.0007
30	0.964	0.0553	16.8565	0.2871	2.1133		0.2106	0.0374	0.0553	16.8884	0.2327	2.1266		0.2005		0.0023	0.1197	0.0575				0.0007
45	1.132	0.0544	16.0604	0.3214	2.2752		0.2197	0.0384	0.0533	16.3002	0.2535	2.2969		0.2148		0.0023	0.1328	0.0864	0.2476			0.0008
60	1.175	0.0546	15.6093	0.3601	2.5575		0.2371	0.0408	0.0556	15.4413	0.2797	2.4871		0.2275		0.0017	0.1232	0.0928	0.1815			0.0008
90	1.365	0.0555	14.3138	0.4259	2.9129		0.2665	0.0466	0.0542	14.3879	0.3269	2.9175		0.2527		0.0014	0.1314	0.1138	0.2307			0.0009
120	1.655	0.059	12.7111	0.4815	3.2477		0.2952	0.0485	0.0551	12.6512	0.3823	3.3463		0.2843		0.0046	0.0573	0.1209	0.0827			0.0008
180	2.16	0.0647	10.4363	0.5656	4.0839		0.3658	0.0537	0.0562	10.554	0.4982	4.1161		0.3576		0.008	0.0431	0.0633	0.1389			0.0007
Processed Data (mol/l)																									Estimated intracellular data from extra and total data (mol/l)
Fps1D1
min	OD	Trehalose_tot	Glucose_tot	Glycerol_tot	Ethanol_tot	Succinate_tot	Acetate_tot	Pyruvate_tot	Trehalose_ext	Glucose_ext	Glycerol_ext	Ethanol_ext	Succinate_ext	Acetate_ext	Pyruvate_ext	Trehalose_int	Glucose_int	Glycerol_int	Ethanol_int	Succinate_int	Acetate_int	Pyruvate_int				Trehalose_int	Glucose_int	Glycerol_int	Ethanol_int		Acetate_int	Pyruvate_int
-60	0.61	0.000164476	0.116823	0.0030697	0.0297265		0.00283764	0.000269135	0.000162723	0.117284	0.00246596	0.0294248		0.00269775	0.000278219	0.00254465	1.39404	0.0510739								0.00305358	-0.802396	1.05174	0.525608		0.243687	-0.0158262
-30	0.8	0.000166813	0.110422	0.00262233	0.0372607		0.00305412	0.000267999	0.000176746	0.113194	0.00256152	0.0369937		0.00287594	0.000278219	0.00225683	1.439	0.0573203	6.03099		0.00857634					-0.0127887	-3.56891	0.0782912	0.34375		0.229417	-0.0131589
-15	0.89	0.000164476	0.107671	0.00268205	0.0413089		0.00316403	0.000272541	0.000172363	0.110285	0.00262233	0.0411895		0.00297752	0.000278219	0.0016898	0.95718	0.0439651	3.97748		0.0520142	0.00788213				-0.00912489	-3.02433	0.0690881	0.138107		0.215763	-0.00656844
0	0.99	0.000164476	0.106974	0.0027472	0.0460451		0.00330058	0.000275948	0.000178206	0.107378	0.0026701	0.0458845		0.00309908	0.000282762	0.00213978	1.17178	0.0704433			0.0331069	0.00831759				-0.0143671	-0.422722	0.0806689	0.168071		0.210839	-0.00712936
5	1.02	0.000147824	0.0961792	0.00256043	0.0434317		0.00305412	0.000322507	0.000165936	0.097586	0.00250071	0.043219		0.00291757	0.000320236	0.00178533	0.727442	0.0541926			0.133995	0.0069398				-0.0184484	-1.43284	0.0608285	0.216662		0.139083	0.00231327
10	1.09	0.000142273	0.0971326	0.00263318	0.0440742		0.00311907	0.00032705	0.000167397	0.0958885	0.00255935	0.0442262		0.0029642	0.000322507	0.00252712	0.983015	0.0594886	2.43885		0.104037	0.00764027				-0.024148	1.19583	0.0709689	-0.146039		0.148854	0.00436587
15	1.07	0.000148992	0.0944373	0.00272982	0.0451769		0.00318568	0.00032705	0.000163307	0.0965622	0.00264947	0.0451031		0.00300916	0.000322507	0.00313823	0.905566	0.0858921			0.159372	0.00776279				-0.0139794	-2.07505	0.0784693	0.0720708		0.172382	0.00443588
20	1.08	0.000151914	0.0956127	0.00286773	0.0460712		0.00327061	0.000328185	0.00016506	0.0957286	0.00276566	0.0460365		0.00307077	0.000323643	0.0036792	0.668241	0.117816	14.2927		0.141967	0.00660069				-0.0127357	-0.112359	0.0988812	0.0336448		0.193591	0.00440046
30	1.14	0.000155127	0.0939168	0.00447153	0.047977		0.00343547	0.000331592	0.000161554	0.0932009	0.00310119	0.0479162		0.003199	0.000322507	0.00757172	0.695002	0.127649			0.155687	0.00735805				-0.00594921	0.662641	1.26845	0.0562579		0.218886	0.0084092
45	1.24	0.000156004	0.0907614	0.00529243	0.0510072		0.00370691	0.000344084	0.000162723	0.0913801	0.0049797	0.0509811		0.00348709	0.000324779	0.0141616	1.34167	0.250024	0.683934		0.190279	0.00982997				-0.00581637	-0.535613	0.270703	0.0225473		0.190279	0.0167109
60	1.18	0.000167689	0.0877292	0.0063001	0.0544389		0.00395837	0.000373609	0.000154543	0.087556	0.00586467	0.0544085		0.00374355	0.000330457	0.0186684	0.954469	0.364531			0.226318	0.0122647				0.0118321	0.155832	0.391895	0.0273505		0.193345	0.0388384
90	1.4	0.000170903	0.0807175	0.00848591	0.0618754		0.00443797	0.000501931	0.000157172	0.0811648	0.00791475	0.0616714		0.00423147	0.00041449	0.0189905	0.652841	0.411458			0.172937	0.0144036				0.0108848	-0.354576	0.452776	0.161748		0.163696	0.0693171
120	1.49	0.00017324	0.0735993	0.010739	0.0699414		0.00494754	0.000624574	0.000156004	0.0739839	0.0100484	0.0714804		0.00471107	0.000522371	0.0184557	0.394081	0.513239			0.196461	0.00950763				0.0131191	-0.29271	0.525636	-1.17135		0.179984	0.0777897
180	1.88	0.000178791	0.05746	0.0149467	0.088511		0.00612656	0.000744947	0.000153666	0.0578596	0.0140324	0.0907879		0.00589842	0.000696116	0.0205353	0.430587	0.744919	6.05466		0.248744	0.00997788				0.0169811	-0.270054	0.617953	-1.53897		0.154199	0.0330038
221	2.13	0.000197195	0.0467525	0.0170739	0.102826		0.00711241	0.000783557	0.000158633	0.0479883	0.0161781	0.100677		0.00677935	0.000726777	0.0312456	0.332231	0.646536	2.03136		0.223721	0.0103682				0.0251489	-0.805968	0.584219	1.40142		0.217205	0.0370292
Gpd1D
Time	OD	Trehalose_tot	Glucose_tot	Glycerol_tot	Ethanol_tot	Succinate_tot	Acetate_tot	Pyruvate_tot	Trehalose_ext	Glucose_ext	Glycerol_ext	Ethanol_ext	Succinate_ext	Acetate_ext	Pyruvate_ext	Trehalose_int	Glucose_int	Glycerol_int	Ethanol_int	Succinate_int	Acetate_int	Pyruvate_int				Trehalose_int	Glucose_int	Glycerol_int	Ethanol_int		Acetate_int	Pyruvate_int
-60	0.5		0.111559	0.00142681	0.0290037		0.00373689	0.000517829		0.112277	0.00142898	0.0288952		0.00342048	0.000511015												-1.61043	-0.00487038	0.243397		0.709584	0.0152804
-30	0.68		0.107269	0.00147458	0.0355199		0.00386012	0.000517829		0.107983	0.00147241	0.0356805		0.00351041	0.000515558												-1.0972	0.00333368	-0.246568		0.536822	0.00348638
-15	0.75		0.105857	0.00150716	0.0397656		0.00403997	0.000526913		0.106889	0.00151367	0.0401346		0.00390674	0.000531456												-1.42244	-0.00897833	-0.508517		0.183591	-0.00625974
0	0.83		0.103406	0.00152019	0.0439592		0.00412323	0.000533727		0.104905	0.00154191	0.0441285		0.0034771	0.000540541												-1.85777	-0.0269267	-0.209923		0.801129	-0.00844805
5	0.84		0.0944817	0.00141812	0.0414239		0.00387011	0.000499659		0.0957592	0.00141595	0.0416497		0.00372356	0.000499659												-1.56488	0.0026603	-0.276532		0.179515	0
10	0.84		0.0935527	0.00142681	0.0423008		0.00385679	0.000499659		0.0935705	0.00139423	0.0422097		0.00378684	0.000492846												-0.0217533	0.0399045	0.111676		0.0856775	0.00834648
15	0.86		0.0937847	0.00145938	0.0437117		0.00393339	0.000508744		0.0943607	0.00140075	0.0433862		0.0038801	0.000497388												-0.689217	0.0701579	0.389571		0.0637603	0.0135873
20	0.86		0.0920832	0.00145504	0.0440243		0.00398002	0.000499659		0.093707	0.00142246	0.0443542		0.00389009	0.000499659												-1.94282	0.0389766	-0.394765		0.107595	0
30	0.91		0.0918446	0.00149196	0.0464901		0.00416986	0.000511015		0.0924162	0.00142898	0.046807		0.00400666	0.000499659												-0.647173	0.0713075	-0.358816		0.184778	0.0128576
45	0.92		0.0886792	0.00153105	0.0496549		0.00429975	0.000506473		0.0894084	0.00137251	0.0494986		0.00417319	0.000495117												-0.817022	0.17763	0.175109		0.141806	0.0127237
60	0.96		0.0865239	0.0015962	0.0526026		0.00459617	0.000517829		0.0868979	0.00132256	0.0532668		0.0044363	0.000499659												-0.402612	0.294545	-0.714965		0.172084	0.0195579
90	1.09		0.0815105	0.00158317	0.0617191		0.00603497	0.000449693		0.0821554	0.00122049	0.0619232		0.00432973	0.00042471												-0.619785	0.348582	-0.19611		1.63899	0.0240123
120	1.3		0.076495	0.00170044	0.07117		0.00638135	0.000467863		0.0769745	0.00125307	0.0713045		0.0060383	0.000451965												-0.400547	0.373733	-0.112426		0.286582	0.0132814
180	1.85		0.0639512	0.00184377	0.0930671		0.00724396	0.000517829		0.0639967	0.00122918	0.103295		0.00701082	0.000499659												-0.0309489	0.417995	-6.95621		0.158563	0.0123574
207	2.03		0.0594695	0.00187418	0.100534		0.00772356	0.000538269		0.0472375	0.000994638	0.0835945		0.00584513	0.000406541												8.06459	0.579883	11.1682		1.23846	0.0868491
0
Hog1-att
min	OD	Trehalose_tot	Glucose_tot	Glycerol_tot	Ethanol_tot	Succinate_tot	Acetate_tot	Pyruvate_tot	Trehalose_ext	Glucose_ext	Glycerol_ext	Ethanol_ext	Succinate_ext	Acetate_ext	Pyruvate_ext	Trehalose_int	Glucose_int	Glycerol_int	Ethanol_int	Succinate_int	Acetate_int	Pyruvate_int				Trehalose_int	Glucose_int	Glycerol_int	Ethanol_int		Acetate_int	Pyruvate_int
-60	0.38								0.000161554	0.108346	0.002087	0.0184979		0.00196336	0.000380422	0.00393346	3.97502	0.113306			0.207401	1.70864
-30	0.49	0.000159801	0.104956	0.00214129	0.023779		0.00219983	0.000366795	0.000147239	0.105456	0.00213587	0.0235989		0.00217152	0.000371338	0.00404014	2.48909	0.0825916	9.92604		0.145856	1.09147				0.0289544	-1.15245	0.0125139	0.415253		0.0652512	-0.0104697
-15	0.5	0.000156588	0.103547	0.0021717	0.0266985		0.0023164	0.000353168	0.000164183	0.104265	0.00216301	0.0266204		0.00220816	0.000363389	0.00458622	2.39076	0.0852317			0.194202	0.0178272				-0.0170345	-1.61168	0.0194815	0.175246		0.242753	-0.0229207
0	0.57	0.000171779	0.102186	0.00220645	0.0296853		0.00239634	0.000354304	0.000166813	0.102161	0.00219776	0.029657		0.00228476	0.000366795	0.00497635	2.93038	0.0760408	5.93232		0.192261	0.0171944				0.00939977	0.0472643	0.0164412	0.0534073		0.211172	-0.0236423
5	0.57	0.000158341	0.0936598	0.00203705	0.0278858		0.00222148	0.00043266	0.000154543	0.0942292	0.00201099	0.0279857		0.0021249	0.000440609	0.00331757	1.71937	0.113034			0.157591	0.0150451				0.00718806	-1.07763	0.0493237	-0.18898		0.182806	-0.0150451
10	0.59	0.000157172	0.0916143	0.00206854	0.0285066		0.00226311	0.00043266	0.000145194	0.0934573	0.00201642	0.0286152		0.00218318	0.000441744	0.00370924	1.68901	0.159532			0.132903	0.0144183				0.0217256	-3.34278	0.0945376	-0.196855		0.144985	-0.016478
15	0.59	0.000156296	0.0903058	0.00209243	0.0292685		0.00226978	0.000434931	0.000147824	0.092869	0.00202511	0.0291947		0.00220649	0.000439473	0.00370924	1.45146	0.181197			0.217477	0.0144183				0.0153669	-4.6493	0.122111	0.133861		0.11478	-0.00823902
20	0.59	0.000153666	0.0901238	0.00214238	0.0300043		0.00233639	0.000437202	0.000142565	0.0922447	0.00203597	0.0299067		0.00224813	0.000439473	0.00476903	1.85006	0.259979			0.217477	0.016478				0.0201359	-3.84707	0.193014	0.177169		0.160087	-0.00411951
30	0.61	0.000157464	0.0910855	0.00226834	0.0313675		0.00242798	0.000438337	0.000144026	0.0906204	0.00206746	0.0311678		0.00229475	0.000439473	0.00559824	1.3457	0.452098			0.176963	0.0138479				0.0234108	0.81013	0.34995	0.347884		0.232082	-0.00197828
45	0.63	0.000153959	0.0874218	0.00246596	0.0333623		0.00254122	0.000439473	0.000160386	0.0886792	0.00214347	0.0334339		0.00243297	0.000441744	0.00685691	1.64395	0.69723			0.173096	0.0152307				-0.0107751	-2.1082	0.540672	-0.120089		0.181471	-0.00380767
60	0.66	0.000149869	0.0876215	0.00268531	0.0360951		0.00265112	0.000448558	0.000146655	0.0862841	0.00223685	0.0360234		0.00253955	0.000444015	0.0051037	1.78031	0.843291			0.230094	0.0162317				0.0051037	2.12403	0.712228	0.113761		0.177199	0.00721407
90	0.81	0.000147239	0.0831964	0.00412731	0.0417473		0.00291091	0.000461049	0.000154251	0.082535	0.00249637	0.0431496		0.00277935	0.000455371	0.00297082	1.12018	0.919257	1.09538		0.167227	0.0115479				-0.00891246	0.840842	2.07316	-1.78241		0.167227	0.00721746
120	0.85	0.000151621	0.079162	0.00462789	0.0478272		0.00323397	0.000483761	0.000156296	0.079788	0.00284492	0.0471522		0.00304246	0.00047127	0.00282916	0.933759	0.966121	5.44435		0.199571	0.0109973				-0.00565832	-0.757755	2.15833	0.817178		0.231825	0.0151213
180	1.19	0.000155419	0.0685921	0.00564099	0.0636358		0.00386012	0.000540541	0.000160093	0.0694556	0.00481683	0.0639049		0.00367194	0.000523507	0.003134	0.616158	0.84744	0.979938		0.203954	0.0101519				-0.00417867	-0.771934	0.736778	-0.240618		0.168225	0.0152278
202	1.34	0.000151037	0.0640122	0.00601778	0.0683677		0.00409659	0.00054849	0.000159217	0.0652719	0.00519253	0.0684198		0.00391341	0.000538269	0.00382014	0.566012	0.770291	0.672337		0.22184	0.00928084				-0.00668524	-1.02952	0.674449	-0.0425754		0.149708	0.00835275
0
Hog1D
min	OD	Trehalose_tot	Glucose_tot	Glycerol_tot	Ethanol_tot	Succinate_tot	Acetate_tot	Pyruvate_tot	Trehalose_ext	Glucose_ext	Glycerol_ext	Ethanol_ext	Succinate_ext	Acetate_ext	Pyruvate_ext	Trehalose_int	Glucose_int	Glycerol_int	Ethanol_int	Succinate_int	Acetate_int	Pyruvate_int				Trehalose_int	Glucose_int	Glycerol_int	Ethanol_int		Acetate_int	Pyruvate_int
-60	0.61	0.000182444	0.112579	0.00286013	0.0300347		0.00267777	0.000248694	0.000175687	0.112617	0.0027776	0.02972		0.00256286	0.000238474	0.003841	1.42788	0.0586404	0.552077		0.237885	0.00989138				0.0117705	-0.0667052	0.143763	0.548296		0.200171	0.0178045
-30	0.77	0.000179676	0.10727	0.0028927	0.037404		0.00285429	0.000247558	0.000176961	0.108632	0.00284927	0.0372086		0.00276936	0.000243016	0.00363852	1.46941	0.0567473	0.709712		0.225382	0.010652				0.00363696	-1.82412	0.0582023	0.261779		0.113807	0.00608684
-15	0.93	0.000180199	0.104993	0.00291659	0.0417083		0.00298585	0.00024983	0.000176409	0.106022	0.00289705	0.041476		0.00286761	0.000247558	0.00269734	0.905284	0.0409426	4.67234		0.169903	0.00881548				0.00420372	-1.14099	0.0216755	0.257568		0.131121	0.00251871
0	0.97	0.000179602	0.102191	0.00295025	0.0456566		0.00302415	0.000250965	0.000178917	0.103	0.00292202	0.0461754		0.00297252	0.000248694	0.00296985	1.07442					0.00847482				0.000730813	-0.862609	0.0300991	-0.553084		0.0550376	0.00242138
5	0.97	0.000172328	0.0926709	0.0027472	0.0457152		0.00286428	0.00032705	0.000170334	0.0935966	0.00269942	0.0434578		0.00278102	0.000328185	0.0031181	0.975612	0.0578829	0.104137			0.00847482				0.00212616	-0.986853	0.050937	2.40672		0.0887704	-0.00121069
10	1.05	0.000172251	0.0915161	0.00277326	0.0444563		0.00289592	0.000328185	0.000168883	0.092591	0.00269725	0.0442696		0.00283764	0.000329321	0.00344751	0.959127	0.0980942	0.493457		0.137214	0.00789136				0.00334403	-1.0671	0.0754571	0.185316		0.0578612	-0.00112734
15	1.06	0.000172922	0.0909795	0.00281344	0.045331		0.00297585	0.000330457	0.000166897	0.0916709	0.00268313	0.0449381		0.00287427	0.000328185	0.00370579	0.921716	0.127219	5.97525		0.167234	0.00782629				0.00593225	-0.680769	0.128288	0.38681		0.100012	0.00223608
20	1	0.000172405	0.0907525	0.00286121	0.0458737		0.00304246	0.000336134	0.00016737	0.0914018	0.00272114	0.0478164		0.00294088	0.000332728	0.00441489	1.05813	0.179011	5.18758		0.15367	0.00824198				0.0052211	-0.673199	0.145235	-2.01427		0.105324	0.00353228
30	1.03	0.000171556	0.0896121	0.00295677	0.0483655		0.00311074	0.000338406	0.00016956	0.0900982	0.00277326	0.0480356		0.00304413	0.000336134	0.00536156	1.14588	0.243401	3.50453		0.176553	0.009173				0.00201531	-0.490851	0.185292	0.333139		0.0672585	0.00229325
45	1.04	0.000172314	0.0869451	0.00310661	0.0533796		0.00323231	0.000341812	0.000167576	0.0881931	0.0028395	0.0509941		0.00318235	0.000340677	0.00585148	0.823341	0.329381	4.48081		0.171716	0.00909489				0.00474314	-1.24946	0.267418	2.38817		0.0500143	0.00113686
60	1.15	0.000172809	0.0846532	0.00329338	0.0533427		0.00334388	0.000348626	0.000169521	0.0862242	0.00294265	0.054313		0.00332723	0.000346355	0.00586025	0.8007	0.395175	2.67308		0.188242	0.00834904				0.00302205	-1.44381	0.322327	-0.891691		0.0153042	0.00208726
90	1.25	0.000174382	0.0807431	0.0036908	0.0600564		0.00382182	0.000362253	0.000170812	0.0817481	0.00323257	0.0605882		0.00369692	0.000358846	0.00512702	0.528508	0.459614	7.49019		0.189112	0.00683877				0.0030711	-0.864614	0.394222	-0.457516		0.10745	0.0029309
120	1.32	0.000174118	0.0765094	0.00414903	0.0672216		0.00430308	0.000383829	0.000171186	0.0771393	0.00361479	0.0666204		0.00415321	0.000377016	0.00532885	0.710615	0.509536	4.81665		0.225625	0.00750531				0.00242201	-0.520353	0.441359	0.496728		0.123819	0.00562898
180	1.53	0.00017962	0.0661099	0.00512304	0.0807944		0.00516236	0.000429253	0.000169932	0.0672536	0.00455514	0.0801845		0.00498418	0.000423575	0.00886433	0.561415	0.483805	2.83961		0.221968	0.00765327				0.00725493	-0.856459	0.42526	0.456743		0.13343	0.00425182
209	1.66	0.000186475	0.062005	0.00549005	0.0868135		0.00563863	0.000451965	0.000168536	0.0628124	0.00496667	0.0870892		0.00562198	0.000447422	0.0119475	0.435756	0.431758	0.554174		0.0750281	0.00812115				0.0128288	-0.577437	0.374294	-0.197143		0.0119092	0.00324846
0
NoStress1
Time	OD	Trehalose_tot	Glucose_tot	Glycerol_tot	Ethanol_tot	Succinate_tot	Acetate_tot	Pyruvate_tot	Trehalose_ext	Glucose_ext	Glycerol_ext	Ethanol_ext	Succinate_ext	Acetate_ext	Pyruvate_ext	Trehalose_int	Glucose_int	Glycerol_int	Ethanol_int	Succinate_int	Acetate_int	Pyruvate_int				Trehalose_int	Glucose_int	Glycerol_int	Ethanol_int		Acetate_int	Pyruvate_int
-60	0.63		0.095273	0.00145287	0.0298155		0.00414654	0.000445151		0.0942053	0.00154842	0.0302236		0.00418984	0.000426982												1.79002	-0.160199	-0.684143		-0.0725885	0.0304613
-30	0.8		0.0911709	0.00150282	0.0365835		0.00435304	0.000449693		0.0897814	0.00158534	0.0370436		0.00431307	0.000433795												1.7891	-0.106252	-0.592479		0.0514581	0.0204694
-15	0.84		0.0881077	0.0015267	0.0408422		0.00446961	0.000456507		0.0876704	0.00160923	0.0412763		0.00444629	0.000440609												0.535676	-0.101091	-0.531793		0.0285592	0.0194751
0	0.96		0.0855694	0.00156145	0.0453657		0.00462281	0.00046332		0.0855139	0.00152888	0.0451487		0.00458951	0.000454236												0.0597347	0.0350649	0.233649		0.0358508	0.00977896
5	1.02		0.0851121	0.00167872	0.0477621		0.004796	0.000461049		0.0849456	0.00161357	0.0471109		0.00471274	0.000459914												0.169567	0.0663583	0.663251		0.084807	0.00115663
10	1.06		0.0843818	0.00168958	0.0499414		0.00484263	0.000461049		0.084374	0.00169827	0.0507098		0.00466611	0.000465592												0.0076491	-0.00855256	-0.756523		0.173792	-0.00447217
15	1.05		0.0826593	0.00156797	0.0496809		0.00471274	0.000458778		0.0824373	0.00154625	0.0496158		0.00466278	0.000455371												0.220362	0.0215592	0.0646451		0.0495953	0.00338201
20	1.1		0.0831176	0.00172867	0.053193		0.00494588	0.000470134		0.0830067	0.00167438	0.0530063		0.00489592	0.000466727												0.10585	0.0517793	0.178031		0.0476458	0.00324907
30	1.19		0.0811576	0.00175473	0.0569438		0.0050458	0.000476948		0.0829312	0.00176776	0.0578424		0.00492256	0.000486032												-1.58554	-0.0116487	-0.803355		0.110165	-0.00812151
45	1.27		0.077273	0.00177862	0.0623356		0.00522565	0.000479219		0.0798091	0.00180251	0.0634643		0.00513905	0.000513286												-2.15574	-0.0203062	-0.959446		0.0736081	-0.0289586
60	1.4		0.07402	0.0018112	0.0680573		0.00545545	0.000490575		0.0748269	0.00182205	0.0679835		0.00527227	0.000522371												-0.639644	-0.00860792	0.0585045		0.145214	-0.0252062
90	1.69		0.0673574	0.00181337	0.0798481		0.00674771	0.000433795		0.0669323	0.00173736	0.0784328		0.00663114	0.000426982												0.30121	0.0538595	1.00282		0.0826	0.004828
120	2.07		0.0608735	0.00188503	0.089008		0.00721399	0.000451965		0.0613152	0.00183726	0.0894856		0.00712406	0.000458778												-0.289815	0.0313462	-0.313305		0.0589988	-0.00447028
180	2.48		0.0479789	0.00198276	0.10705		0.00640799	0.000501931		0.0485538	0.00199362	0.109742		0.00773022	0.00055871												-0.373327	-0.00705105	-1.74778		-0.858602	-0.0368702
200	3.08		0.0438524	0.00208049	0.117743		0.00813322	0.000595049		0.0449001	0.00209135	0.118884		0.00808326	0.000613218												-0.767739	-0.00795675	-0.836631		0.0366079	-0.013314
0
NoStress2
min	OD	Trehalose_tot	Glucose_tot	Glycerol_tot	Ethanol_tot	Succinate_tot	Acetate_tot	Pyruvate_tot	Trehalose_ext	Glucose_ext	Glycerol_ext	Ethanol_ext	Succinate_ext	Acetate_ext	Pyruvate_ext	Trehalose_int	Glucose_int	Glycerol_int	Ethanol_int	Succinate_int	Acetate_int	Pyruvate_int				Trehalose_int	Glucose_int	Glycerol_int	Ethanol_int		Acetate_int	Pyruvate_int
-60	0.42		0.120876	0.00230852	0.0216909		0.00271607	0.000341812	0.000167397	0.121647	0.00230743	0.0226134		0.00265112		0.00420062	2.59168	0.0718204				0.00979699					-2.21825	0.00312262	-2.6529		0.186768	0.982965
-30	0.544		0.116976	0.00236389	0.0282418		0.00286261	0.000334999	0.000168566	0.117487	0.00234761	0.0266573		0.00269109		0.00234604	1.82602	0.0588593				0.00911933					-1.02498	0.0326996	3.18116		0.344354	0.67255
-15	0.608		0.114191	0.00238995	0.0315107		0.00295254	0.000341812	0.000168858	0.115461	0.00238235	0.0315845		0.0028443		0.00255471	1.64122	0.0626702				0.00993045					-2.22064	0.0132937	-0.129074		0.189312	0.597813
0	0.75		0.11191	0.00241819	0.0350597		0.00303747	0.000338406	0.000167689	0.111426	0.00242036	0.034797		0.00294754		0.00241557	1.58533	0.0523736	5.05526			0.00782467					0.666098	-0.00299278	0.361945		0.123924	0.466351
5	0.7		0.102494	0.00226725	0.0337769		0.00286095	0.000311151	0.000153666	0.10411	0.00225748	0.0352507		0.00277769		0.00217053	1.16188	0.0548595	1.09342			0.00674971					-2.40127	0.0145216	-2.19006		0.123726	0.462355
10	0.715		0.102332	0.00227485	0.0334817		0.0029209	0.000315694	0.000153666	0.10294	0.00226291	0.034936		0.00277102		0.00212021	1.12446	0.0520114	1.49025			0.0065932					-0.881206	0.0173371	-2.11092		0.217543	0.458228
15	0.755		0.10174	0.00228463	0.0360777		0.00292756	0.000315694	0.000154835	0.100045	0.00226291	0.0360864		0.00281599		0.00239845	1.31896	0.0520026	0.543526			0.00776924					2.319	0.0297158	-0.0118803		0.152668	0.43197
20	0.845		0.100554	0.00229223	0.03771		0.00298751	0.000315694	0.000154251	0.1012	0.00229766	0.0376948		0.00284763		0.00355741	2.21511	0.0714009	1.68633			0.00967966					-0.786573	-0.0066112	0.0185021		0.170336	0.384421
30	0.89		0.0988785	0.00231394	0.0400152		0.00305745	0.000322507	0.000154251	0.099732	0.00231937	0.0399414		0.00294754		0.00202775	0.919946	0.0439651				0.00656844					-0.987353	-0.00628074	0.0853752		0.127146	0.373087
45	1.01		0.0929023	0.00234869	0.0439918		0.00316236	0.000317965	0.000153082	0.0967403	0.00236498	0.0442392		0.00305912		0.00210137	0.993927	0.0435157	3.39029			0.00700139					-3.94377	-0.0167368	-0.254272		0.106094	0.326732
60	1.08		0.089616	0.00239973	0.0488517		0.00331224	0.000319101	0.000150453	0.0929562	0.00239538	0.048448		0.0031607		0.00198111	1.02413	0.0473368	3.5285			0.0077008					-3.23583	0.00420771	0.391121		0.146806	0.309132
90	1.36		0.0838729	0.00248334	0.0578055		0.00359534	0.000333863	0.000155711	0.0857286	0.00248117	0.0587736		0.00348043		0.00165389	0.764771	0.0368838				0.00642889					-1.50082	0.00175637	-0.782948		0.0929293	0.270013
120	1.73		0.0775538	0.00258975	0.0696006		0.00402331	0.000346355	0.000150745	0.0782586	0.00258106	0.0708031		0.00387677		0.00225103	0.443144	0.0418338	1.94316			0.00636365					-0.493678	0.00608492	-0.842339		0.102651	0.242614
180	2.2		0.0643041	0.00277869	0.0881246		0.00472939	0.000397456	0.000153374	0.0651637	0.00277869	0.0882592		0.00464613		0.00360174	0.299595	0.035934	0.667615			0.00884237					-0.55778	0	-0.0873252		0.0540285	0.257902
0
Pfk2627D
min	OD	Trehalose_tot	Glucose_tot	Glycerol_tot	Ethanol_tot	Succinate_tot	Acetate_tot	Pyruvate_tot	Trehalose_ext	Glucose_ext	Glycerol_ext	Ethanol_ext	Succinate_ext	Acetate_ext	Pyruvate_ext	Trehalose_int	Glucose_int	Glycerol_int	Ethanol_int	Succinate_int	Acetate_int	Pyruvate_int				Trehalose_int	Glucose_int	Glycerol_int	Ethanol_int		Acetate_int	Pyruvate_int
-60	0.4	0.000181851	0.120656	0.00246814	0.0120469		0.00234305	0.00021122	0.00018297	0.123464	0.002517	0.0123247		0.00233139	0.000210084	0.00871767	3.9985	0.114463	19.348			0.0140831				-0.00346939	-8.70585	-0.151495	-0.861405		0.036141	0.00352076
-30	0.47	0.000165737	0.108441	0.00228788	0.0147232		0.00226311	0.00019305	0.000180752	0.120643	0.002517	0.0154851		0.00240966	0.000207813	0.0051076	1.85892		17.1495			0.00831773				-0.0366599	-29.7929	-0.559389	-1.86016		-0.357793	-0.0360435
-15	0.55	0.000167343	0.108384	0.00232589	0.0160082		0.00234138	0.000195321	0.000180222	0.118665	0.00251048	0.0173649		0.00245462	0.000206677	0.00457226	1.76878					0.00899258				-0.0254958	-20.3542	-0.365445	-2.68575		-0.224181	-0.0224815
0	0.6	0.000185439	0.116473	0.002555	0.019364		0.00260783	0.000213491	0.000181532	0.117321	0.0025398	0.0194834		0.00252789	0.000208948	0.00500562	2.05917	0.0656092	7.86144		0.24267	0.0080723				0.00694275	-1.50591	0.0270155	-0.212159		0.142051	0.0080723
5	0.59	0.000173901	0.10503	0.00230417	0.017799		0.00236303	0.000247558	0.000174897	0.107295	0.00234543	0.0182961		0.00232473	0.000244152	0.00488645	1.59942	0.0925681	0.362213		0.244662	0.00823902				-0.00180714	-4.10777	-0.0748423	-0.901595		0.0694718	0.00617926
10	0.64	0.00017524	0.106541	0.00236064	0.0185131		0.00245629	0.000250965	0.000174427	0.106981	0.00234869	0.0186738		0.00237968	0.000246423	0.00599015	1.97553	0.0982912				0.00934488				0.0013382	-0.725184	0.0196582	-0.26436		0.126074	0.0074759
15	0.62	0.000175306	0.106694	0.00237801	0.0190384		0.00249126	0.000253236	0.000171361	0.10673	0.00232372	0.0190167		0.00242964	0.000246423	0.00612349	1.4336	0.142854	6.83872			0.00970116				0.00673924	-0.062578	0.0927624	0.0370863		0.105274	0.0116414
20	0.65	0.000174344	0.106426	0.00240624	0.01944		0.00250458	0.000253236	0.000172402	0.106885	0.00234326	0.0195073		0.00246128	0.000248694	0.00744328	1.46929					0.00734227				0.00313892	-0.740925	0.1018	-0.108766		0.0699857	0.00734227
30	0.59	2.10531e-05							0.000173977	0.105573	0.00235955	0.0203147		0.00255787	0.00024983	0.0136165	1.40113	0.366333				0.0102988				-0.277377	-191.491	-4.2798	-36.8473		-4.63951	-0.453146
45	0.67	0.000183892	0.104442	0.00275806	0.0214326		0.00283097	0.000263457	0.00017391	0.104866	0.00236607	0.021908		0.00270108	0.000253236	0.0184079	1.32372	0.720419	0.420175		0.270363	0.0106365				0.0155815	-0.661858	0.611932	-0.742083		0.202772	0.0159548
60	0.66	0.000179126	0.100248	0.00292962	0.0229846		0.00290092	0.000264592	0.000171221	0.103316	0.00243447	0.0237682		0.00285928	0.000258914	0.0167865	1.34052	1.02264	10.728		0.269766	0.0126246				0.0125547	-4.87294	0.786382	-1.24448		0.066119	0.00901759
90	0.77	0.000178195	0.0994889	0.00342042	0.0279748		0.00333056	0.000289575	0.000173757	0.0999107	0.00263753	0.0277795		0.0031607	0.000274813	0.00965189	1.34002	1.10875				0.00913027				0.0059476	-0.565158	1.0491	0.261779		0.227613	0.0197822
120	0.85	0.000175036	0.0960144	0.00383631	0.0329716		0.00363364	0.00030888	0.000176801	0.0970405	0.00295351	0.0328869		0.00351873	0.000297524	0.00633676	1.05266	1.20798	4.26982		0.30238	0.00962264				-0.00213687	-1.2421	1.06865	0.102476		0.139095	0.0137466
180	1.23	0.000180495	0.0872297	0.00493193	0.046323		0.00452789	0.000361117	0.000174527	0.0874512	0.00371795	0.0454157		0.00425479	0.000346355	0.00708344	0.950327	1.14919	0.419739		0.197274	0.00890242				0.00519853	-0.192869	1.05744	0.790319		0.237889	0.0128591
206	1.45	0.000181776	0.0823274	0.00538364	0.0524702		0.00495754	0.000382694	0.000166036	0.0796748	0.00393512	0.0494747		0.00451957	0.000356575	0.00774241	0.642954	1.10754	0		0.274707	0.00703581				0.01219	2.05436	1.12183	2.31987		0.339192	0.020228
0
WT1																										WT1 est
min	OD	Trehalose_tot	Glucose_tot	Glycerol_tot	Ethanol_tot	Succinate_tot	Acetate_tot	Pyruvate_tot	Trehalose_ext	Glucose_ext	Glycerol_ext	Ethanol_ext	Succinate_ext	Acetate_ext	Pyruvate_ext	Trehalose_int	Glucose_int	Glycerol_int	Ethanol_int	Succinate_int	Acetate_int	Pyruvate_int				Trehalose_int	Glucose_int	Glycerol_int	Ethanol_int		Acetate_int	Pyruvate_int
-30	0.88		0.0883291	0.00190699	0.0458706		0.00150703	0.000469929		0.0877695	0.0018438	0.0453316		0.00130176	0.000539137		0.890038	0.032097	1.26569		0.295056	0.0140859					0.654656	0.0739104	0.630486		0.240102	-0.0809501
-15	1.01		0.085532	0.00189359	0.050071		0.00152643	0.000462035		0.0853552	0.00190657	0.0503266		0.00145744	0.000547756		0.575623	0.0152904	3.39964		0.241173	0.00707114					0.18175	-0.013336	-0.262663		0.0708955	-0.0880847
0	1.08		0.0827823	0.00193192	0.0554806		0.00169736	0.00045709		0.0825032	0.00191291	0.055162		0.00148279	0.000559723		1.31721	0.0567388	2.23232		0.335039	0.00982308					0.27043	0.0184185	0.308646		0.207864	-0.0994267
5	1.02		0.0753424	0.00185894	0.0532285		0.00158674	0.000524591		0.0748008	0.0017657	0.0525564		0.00141274	0.00051596		0.437374	0.0293396	0		0	0.00791522					0.551655	0.0949647	0.684578		0.177222	0.00879134
10	1.04		0.0735999	0.00185736	0.0547319		0.00168893	0.00052708		0.073809	0.00177235	0.0538142		0.0015145	0.000514641		0.599946	0.0975272	0.554487		0.185626	0.00800506					-0.209297	0.0851108	0.91866		0.174619	0.0124531
15	1.08		0.0741849	0.0017851	0.0525603		0.00161436	0.000524174		0.0733216	0.00177096	0.0550109		0.00156529	0.000518721		0.419767	0.128632	2.44867		0.151621	0.00756865					0.836298	0.0137014	-2.37405		0.0475326	0.00528271
20	1.08		0.0724193	0.00191277	0.0549882		0.00178497	0.000525195		0.0726425	0.00181621	0.0555842		0.00158285	0.000520258		0.555697	0.215539	0.598567		0.132492	0.0090352					-0.21617	0.0935466	-0.577349		0.195802	0.00478229
30	1.04		0.0705401	0.00215332	0.0581668		0.0018585	0.000532769		0.0701187	0.00170624	0.0566218		0.00167405	0.000519192		0.566292	0.414764	3.15564		0.310247	0.00984281					0.421878	0.447579	1.54669		0.184661	0.0135921
45	1.13		0.0674307	0.0025599	0.0623584		0.00207464	0.000570039		0.0677231	0.00196828	0.0623682		0.00184553	0.000539524		0.740829	0.571716	2.25055		0.156762	0.00974782					-0.272621	0.551635	-0.0091445		0.213624	0.0284524
60	1.14		0.064381	0.00280445	0.0672666		0.00534616	0.000604874		0.0647414	0.00215863	0.0674757		0.0051089	0.000567367		0.355707	0.611621	2.37461		0.199298	0.00926056					-0.333584	0.597795	-0.193519		0.219611	0.0347178
90	1.46		0.0583405	0.00334191	0.0731978		0.00583364	0.00066496		0.0564694	0.00244272	0.0763575		0.00554448	0.000617013		0.303873	0.659019	2.13209		0.224107	0.00772425					1.44268	0.693301	-2.43623		0.222949	0.0369687
120	1.78		0.0516453	0.0035509	0.0862623		0.00647467	0.000675512		0.0520445	0.00292291	0.0874025		0.00635848	0.00065721		0.379317	0.583322	2.3837		0.283818	0.00791745					-0.275978	0.43413	-0.788222		0.0803231	0.0126521
180	2.08		0.0415594	0.00425453	0.10512		0.00749447	0.00074368		0.0417097	0.00355446	0.101701		0.00742902	0.00070735		0.285918	0.507101	1.94598		0.195094	0.00858341					-0.0984821	0.458795	2.24059		0.0428904	0.0238096
0
WT2																										WT2 est
Time	OD	Trehalose_tot	Glucose_tot	Glycerol_tot	Ethanol_tot	Succinate_tot	Acetate_tot	Pyruvate_tot	Trehalose_ext	Glucose_ext	Glycerol_ext	Ethanol_ext	Succinate_ext	Acetate_ext	Pyruvate_ext	Trehalose_int	Glucose_int	Glycerol_int	Ethanol_int	Succinate_int	Acetate_int	Pyruvate_int				Trehalose_int	Glucose_int	Glycerol_int	Ethanol_int		Acetate_int	Pyruvate_int
-60	0.5		0.0977425	0.00156579	0.0261298		0.00114904	0.00044288		0.0979978	0.00145287	0.025483		0.0011224	0.000417897												-0.572488	0.25326	1.45065		0.0597545	0.0560283
-30	0.66		0.094121	0.00160923	0.0393315		0.00129892	0.000447422		0.0937447	0.00159403	0.0390927		0.00123231	0.000426982												0.59755	0.0241433	0.379205		0.10579	0.0324633
-15	0.73		0.0898923	0.00147458	0.0342435		0.00134555	0.000447422		0.0936304	0.00162877	0.0424094		0.00132889	0.000438337												-5.30393	-0.218781	-11.5865		0.0236286	0.0128903
0	0.78		0.0894728	0.00163095	0.0466117		0.00142215	0.000454236		0.0902408	0.00163529	0.0463252		0.00138551	0.000440609												-1.01529	-0.0057417	0.378762		0.0484306	0.0180141
5	0.8		0.0811343	0.00154191	0.0383113		0.00140216	0.00042471		0.0812264	0.00150282	0.0437291		0.0013622	0.00040427												-0.118606	0.05033	-6.9756		0.0514581	0.0263178
10	0.8		0.080192	0.00153756	0.0442414		0.00145545	0.000422439		0.0820688	0.00151585	0.0421185		0.00135221	0.00040427												-2.41643	0.0279611	2.73323		0.132933	0.0233936
15	0.81		0.0789578	0.00159837	0.0456827		0.00146545	0.00042471		0.0812198	0.00156145	0.0459171		0.00143547	0.000417897												-2.87523	0.046929	-0.297988		0.0381024	0.00866095
20	0.84		0.0785538	0.00167221	0.0468635		0.00150541	0.00042471		0.0809467	0.00152888	0.0467115		0.00143214	0.000406541												-2.93126	0.17558	0.186127		0.0897574	0.0222573
30	0.82		0.0773196	0.0018416	0.0487172		0.00160533	0.000431524		0.0772057	0.0015261	0.0474103		0.00150786	0.000400309												0.142986	0.396043	1.64049		0.122345	0.0391833
45	0.88		0.0751376	0.00206963	0.0507792		0.00161532	0.00044288		0.0751354	0.00170695	0.0475841		0.00157535	0.000440609												0.00259638	0.424209	3.73726		0.0467479	0.00265653
60	0.92		0.0729889	0.00231937	0.0553853		0.00180516	0.000461049		0.072845	0.00175876	0.0534959		0.00174842	0.000426509												0.161285	0.628144	2.11695		0.0635737	0.0387005
90	1.08		0.0664484	0.0027472	0.0632082		0.00217485	0.000508744		0.0698779	0.00216735	0.0631257		0.00210158	0.000486032												-3.32239	0.56173	0.0799065		0.0709833	0.0220023
120	1.24		0.0610511	0.00324669	0.0727588		0.00243131	0.000560981		0.0642175	0.0024171	0.0661472		0.00221815	0.000540541												-2.74099	0.718114	5.72325		0.184513	0.0176939
180	2		0.0504761	0.00401764	0.0896939		0.00300749	0.000608676		0.0517614	0.00321629	0.0816801		0.00278102	0.00059732												-0.850877	0.530529	5.3055		0.149937	0.00751804
206	2.04		0.0447081	0.00421092	0.0951769		0.00336053	0.000626845		0.0469023	0.00357462	0.094478		0.003194	0.000613218												-1.4448	0.41898	0.460218		0.109651	0.00897281
0
WT3																										WT3 est
Time	OD	Trehalose_tot	Glucose_tot	Glycerol_tot	Ethanol_tot	Succinate_tot	Acetate_tot	Pyruvate_tot	Trehalose_ext	Glucose_ext	Glycerol_ext	Ethanol_ext	Succinate_ext	Acetate_ext	Pyruvate_ext	Trehalose_int	Glucose_int	Glycerol_int	Ethanol_int	Succinate_int	Acetate_int	Pyruvate_int				Trehalose_int	Glucose_int	Glycerol_int	Ethanol_int		Acetate_int	Pyruvate_int
-60	0.54		0.108373	0.00162226	0.028626		0.000849292	0.000522371		0.110327	0.00164615	0.0281919		0.000829309	0.000515558												-3.96121	-0.0484156	0.879842		0.0405006	0.0138091
-30	0.67		0.105334	0.00168958	0.0348904		0.000962531	0.000526913		0.106716	0.00169827	0.0351856		0.000902581	0.00021122												-2.1571	-0.0135608	-0.460837		0.0935871	0.492825
-15	0.79		0.105287	0.00167438	0.0373736		0.00111907	0.000547354		0.105285	0.00176559	0.0395225		0.00100583	0.0005201												0.00289555	-0.11898	-2.80313		0.147714	0.0355516
0	0.85		0.0990566	0.0016266	0.0415498		0.00111574	0.000526913		0.101751	0.0016266	0.047176		0.00105912	0.000531456												-3.26211	0	-6.8107		0.0685394	-0.00549865
5	0.89		0.0914517	0.00162226	0.0411808		0.00116903	0.000499659		0.0934162	0.00162226	0.041259		0.00106245	0.000490575												-2.27258	0	-0.0903973		0.123293	0.0105095
10	0.89		0.0908868	0.00167872	0.0419275		0.0011657	0.000504202		0.0917492	0.00163312	0.0415021		0.00112573	0.000492846												-0.997625	0.0527582	0.492163		0.0462348	0.0131369
15	0.87		0.0903407	0.00173302	0.0426004		0.0012423	0.000504202		0.0924251	0.00163963	0.0484958		0.00116903	0.000497388												-2.46555	0.110462	-6.97357		0.0866729	0.00805965
20	0.9		0.0889678	0.00168741	0.0427567		0.00129226	0.000504202		0.0906726	0.00163529	0.0430085		0.00117902	0.000490575												-1.95087	0.059645	-0.288139		0.129586	0.0155943
30	0.9		0.0883918	0.00206529	0.0452616		0.0013955	0.000531456		0.0888912	0.00157231	0.0450575		0.00125895	0.000492846												-0.571545	0.564142	0.233492		0.156266	0.0441838
45	0.9		0.0846748	0.00230852	0.0497374		0.00157868	0.000526913		0.0877048	0.0018416	0.0498633		0.00137552	0.000515558												-3.46738	0.534319	-0.14407		0.232493	0.0129952
60	0.98		0.0842353	0.00265164	0.0529064		0.00165862	0.000574608		0.083616	0.00196539	0.0596049		0.00154205	0.000524642												0.654064	0.724765	-7.07438		0.123111	0.0527697
90	1.14		0.0765261	0.00293614	0.0620143		0.00193838	0.000601862		0.0787991	0.00239321	0.0698459		0.0017985	0.000581422												-2.10401	0.502554	-7.24923		0.129482	0.0189207
120	1.35		0.0723174	0.00371143	0.0722075		0.00235137	0.000676811		0.070495	0.00266685	0.0769742		0.00217485	0.000622303												1.48157	0.849216	-3.87514		0.143505	0.0443135
180	2.04		0.0579023	0.00443895	0.0998046		0.00308743	0.000710879		0.0584395	0.00363542	0.0997005		0.00298418	0.000694981												-0.353709	0.529087	0.0686039		0.0679837	0.0104683
206	2.14		0.054929	0.0048646	0.097964		0.00353372	0.000760845		0.0535383	0.0039134	0.107697		0.0032373	0.000717692												0.906171	0.619808	-6.34207		0.193148	0.0281183
0
WT4																										WT4 est
min	OD		Glucose_tot	Glycerol_tot	Ethanol_tot	Succinate_tot	Acetate_tot	Pyruvate_tot	Trehalose_ext	Glucose_ext	Glycerol_ext	Ethanol_ext	Succinate_ext	Acetate_ext	Pyruvate_ext	Trehalose_int	Glucose_int	Glycerol_int	Ethanol_int	Succinate_int	Acetate_int	Pyruvate_int				Trehalose_int	Glucose_int	Glycerol_int	Ethanol_int		Acetate_int	Pyruvate_int
-60	0.544		0.117002	0.00250071	0.0267463		0.00288426	0.000362253	0.000167105	0.117513	0.00249854	0.0284524		0.00281266	0	0.00351905	1.88173	0.078479				0.0068395				-0.335483	-1.02609	0.00435995	-3.4252		0.14376	0.727266
-30	0.692		0.112959	0.00258432	0.0347363		0.00312073	0.000362253	0.000164768	0.112619	0.00255175	0.0362514		0.00297918	0	0.00263828	1.34727	0.0637397	6.29237			0.00683687				-0.247998	0.512014	0.0490306	-2.28041		0.21305	0.545241
-15	0.84		0.109627	0.00261581	0.0388561		0.00323231	0.000362253	0.000167105	0.110637	0.0026093	0.0388886		0.00310908	0	0.00178934	0.822548	0.0478853				0.0069554				-0.204701	-1.23722	0.00798089	-0.0398845		0.150956	0.443754
0	0.94		0.107179	0.00266793	0.0429889		0.00338052	0.000369067	0.000167981	0.106059	0.00260821	0.0428999		0.00318568	0	0.00224506	1.15632	0.0548359	3.60067			0.00748014				-0.184416	1.22882	0.0655646	0.0977019		0.2139	0.405174
5	0.972		0.098131	0.00251917	0.0409334		0.00314405	0.000411083	0.000153959	0.0965816	0.00245619	0.0410028		0.00302748	0	0.00155435	0.729286	0.087815	4.66341			0.00604195				-0.163828	1.64872	0.0670167	-0.0739124		0.124042	0.437437
10	0.916		0.0969839	0.00258432	0.0418494		0.00321232	0.000415626	0.000158925	0.0958097	0.00246596	0.042023		0.00307744	0	0.00262957	0.799202	0.180814	5.4559			0.00766609				-0.178811	1.32118	0.133167	-0.195377		0.151766	0.467631
15	0.96		0.0967403	0.00269182	0.042913		0.00329059	0.000416761	0.000158341	0.0966748	0.00246922	0.0429282		0.00311907	0	0.00314467	0.938432	0.282857	1.42292			0.00855659				-0.170441	0.0704869	0.23961	-0.0163554		0.184631	0.44861
20	0.968		0.0955511	0.00282647	0.0438593		0.00334555	0.000416761	0.000157756	0.0936931	0.00249528	0.0439223		0.00316736	0	0.00468084	0.892116	0.417553	2.74056			0.008491				-0.16851	1.98459	0.35376	-0.0672387		0.190331	0.445171
30	0.964		0.0935433	0.00311747	0.0458715		0.00350708	0.00042471	0.000161554	0.0937203	0.00252677	0.0461602		0.00333888	0	0.00720486	0.712269	0.669487				0.00852362				-0.17323	-0.189819	0.633393	-0.309555		0.180349	0.455405
45	1.132		0.0891254	0.00348992	0.0493857		0.00365862	0.000436066	0.000155711	0.0904562	0.00275263	0.0498567		0.00357702	0	0.00625596	0.686146	0.873487	5.00387			0.00845833				-0.144975	-1.23899	0.686456	-0.438546		0.0759725	0.406
60	1.175		0.0866221	0.00391014	0.0555133		0.00394838	0.00046332	0.000162431	0.0856898	0.00303712	0.0539852		0.00378851	0	0.00448518	0.617439	0.91003	3.55792			0.00820445				-0.146692	0.841963	0.788431	1.38004		0.144376	0.418427
90	1.365		0.0794329	0.00462463	0.0632277		0.00443797	0.000529185	0.000158341	0.0798441	0.00354964	0.0633275		0.00420816	0	0.0032993	0.588222	0.99681	4.03952			0.00824451				-0.12773	-0.331714	0.867173	-0.0805453		0.185382	0.426882
120	1.655		0.0705388	0.00522836	0.0704949		0.0049159	0.000550761	0.00016097	0.0702064	0.0041512	0.0726351		0.00473439	0	0.00962577	0.227764	0.94033	1.2858			0.00650722				-0.1153	0.238098	0.771553	-1.533		0.130016	0.3945
180	2.16		0.0579151	0.00614156	0.0886455		0.00609159	0.000609811	0.000164183	0.0585683	0.0054097	0.0893445		0.00595504	0	0.015205	0.155606	0.447174	1.96149			0.00517157				-0.106815	-0.424937	0.476138	-0.454716		0.088839	0.396733
Wtmeans																										mean est
min	OD		Glucose_tot	Glycerol_tot	Ethanol_tot		Acetate_tot	Pyruvate_tot	Trehalose_ext	Glucose_ext	Glycerol_ext	Ethanol_ext		Acetate_ext	Pyruvate_ext	Trehalose_int	Glucose_int	Glycerol_int	Ethanol_int		Acetate_int	Pyruvate_int					Glucose_int	Glycerol_int	Ethanol_int		Acetate_int	Pyruvate_int
-60	0.528		0.107706	0.00189625	0.0271674		0.00162753	0.000442501	0.000167105	0.108613	0.00186585	0.0273757		0.00158812	0.000311151	0.00351905	1.88173	0.078479				0.0068395				-0.348668	-1.89238	0.0634382	-0.434787		0.0822333	0.274065
-30	0.7255		0.100186	0.00194753	0.0387072		0.0017223	0.000451629	0.000164768	0.100212	0.00192196	0.0389653		0.00160396	0.000294334	0.00263828	1.11866	0.0479184	3.77903		0.295056	0.0104614				-0.235369	-0.0377404	0.0365263	-0.368726		0.169056	0.224694
-15	0.8425		0.0975846	0.00191459	0.0401361		0.00180584	0.000454766	0.000167105	0.0987268	0.00197756	0.0427868		0.00172531	0.000376548	0.00178934	0.699085	0.0315879	3.39964		0.241173	0.00701327				-0.20409	-1.39505	-0.0769025	-3.23741		0.0983523	0.0955295
0	0.9125		0.0946226	0.00196435	0.0466578		0.00190394	0.000451827	0.000167981	0.0951387	0.00194575	0.0478908		0.00177827	0.000382947	0.00224506	1.23677	0.0557873	2.9165		0.335039	0.00865161				-0.189695	-0.582799	0.0210016	-1.39241		0.141908	0.077783
5	0.9205		0.0865149	0.00188557	0.0434135		0.00182549	0.000465011	0.000153959	0.0865063	0.00183674	0.0446368		0.00171622	0.000352701	0.00155435	0.58333	0.0585773	2.3317			0.00697858				-0.172414	0.00963197	0.0546795	-1.36997		0.122377	0.125773
10	0.9115		0.0854157	0.00191449	0.0456875		0.0018806	0.000467337	0.000158925	0.0858592	0.00184682	0.0448645		0.00176747	0.000352939	0.00262957	0.699574	0.139171	3.00519		0.185626	0.00783557				-0.179656	-0.501351	0.0765019	0.930438		0.127889	0.129321
15	0.93		0.0850559	0.00195208	0.0459391		0.00190317	0.000467462	0.000158341	0.0859103	0.00186032	0.048088		0.00182221	0.000358502	0.00314467	0.679099	0.205744	1.9358		0.151621	0.00806262				-0.175598	-0.947501	0.101762	-2.3831		0.0897827	0.120836
20	0.947		0.083873	0.00202471	0.0471169		0.00198205	0.000467717	0.000157756	0.0844887	0.00186891	0.0473066		0.00184034	0.000354343	0.00468084	0.723906	0.316546	1.66956		0.132492	0.0087631				-0.171987	-0.671261	0.169854	-0.206802		0.154486	0.123601
30	0.931		0.0824487	0.00229442	0.0495043		0.0020916	0.000480115	0.000161554	0.082484	0.00183285	0.0488125		0.00194494	0.000353087	0.00720486	0.639281	0.542125	3.15564		0.310247	0.00918322				-0.178979	-0.0390952	0.511349	0.766414		0.162486	0.140729
45	1.0105		0.0790921	0.00260699	0.0530652		0.00223181	0.000493975	0.000155711	0.0802549	0.00206737	0.0524181		0.00209336	0.000373923	0.00625596	0.713487	0.722602	3.62721		0.156762	0.00910307				-0.159933	-1.19424	0.554256	0.664648		0.142213	0.123307
60	1.05375		0.0770568	0.0029214	0.0577679		0.00318958	0.000525963	0.000162431	0.076723	0.00222997	0.0586405		0.00304697	0.00037963	0.00448518	0.486573	0.760825	2.96627		0.199298	0.00873251				-0.160748	0.330336	0.684265	-0.863482		0.14113	0.144817
90	1.26125		0.070187	0.00341247	0.065412		0.00359621	0.000576188	0.000158341	0.0712476	0.00263823	0.0681642		0.00341318	0.000421117	0.0032993	0.446048	0.827915	3.08581		0.224107	0.00798438				-0.135299	-0.906314	0.661568	-2.35166		0.156396	0.132505
120	1.50625		0.0638882	0.00393435	0.0754309		0.00404331	0.000616016	0.00016097	0.0642409	0.00303952	0.0757897		0.00387147	0.000455013	0.00962577	0.30354	0.761826	1.83475		0.283818	0.00721234				-0.121695	-0.266659	0.676504	-0.271295		0.129917	0.12172
180	2.07		0.0519632	0.00471317	0.095816		0.00492025	0.000668262	0.000164183	0.0526197	0.00395397	0.0931065		0.00478731	0.000499913	0.015205	0.220762	0.477137	1.95374		0.195094	0.00687749				-0.107719	-0.430698	0.498105	1.77767		0.0872145	0.110452
206	2.09		0.0498185	0.00453776	0.0965704		0.00344713	0.000693845		0.0502203	0.00374401	0.101087		0.00321565	0.000665455											0	-0.263027	0.519641	-2.95713		0.151537	0.0185856
WT stdevs																										stdev est
min	OD		Glucose_tot	Glycerol_tot	Ethanol_tot		Acetate_tot	Pyruvate_tot		Glucose_ext	Glycerol_ext	Ethanol_ext		Acetate_ext	Pyruvate_ext		Glucose_int	Glycerol_int	Ethanol_int			Pyruvate_int					Glucose_int	Glycerol_int	Ethanol_int		Acetate_int	Pyruvate_int
-60	0.0243311		0.0096469	0.000524235	0.00130029		0.00109863	8.00597e-05		0.00986985	0.000556381	0.00164435		0.00107056	0.000273854												1.11819	0.161227	1.72564		-0.140811	0.971957
-30	0.103864		0.011061	0.000442769	0.00522941		0.000958898	6.83335e-05		0.0114438	0.000432172	0.00455329		0.000933207	0.000238792		0.323314	0.0223748	3.5544			0.00512585					4.71663	-0.130538	-8.32899		-0.31648	2.09982
-15	0.120381		0.011673	0.000497815	0.00689674		0.000965471	7.58023e-05		0.0113963	0.000436162	0.00525494		0.000941871	0.000255294		0.174602	0.0230481				8.1843e-05					-4.84166	-1.07885	-28.7295		-0.412971	3.14089
0	0.129454		0.0107087	0.000490344	0.00625557		0.00101264	6.46033e-05		0.0107492	0.00046122	0.00518786		0.000955606	0.000260306		0.113764	0.00134558	0.967573			0.00165671					0.919606	-0.661535	-24.2531		-1.29562	4.4454
5	0.0966144		0.0102157	0.000443319	0.0066709		0.000895497	5.56257e-05		0.0102332	0.000426721	0.00542092		0.000887739	0.000239944		0.206412	0.0413484				0.0013246					0.190649	-0.180845	-13.6193		-0.0845203	2.00826
10	0.0990404		0.0104985	0.000465331	0.00613082		0.000913247	5.66218e-05		0.00988734	0.000425871	0.00597267		0.000887746	0.000240085		0.140895	0.0588928	3.46582			0.000239686					-6.92718	-0.447247	-1.79252		-0.289043	2.07942
15	0.117473		0.0103251	0.000499399	0.00462641		0.000937498	5.46636e-05		0.0106269	0.000415039	0.00514556		0.000880164	0.000242907		0.366751	0.109053	0.725316			0.000698576					4.91903	-1.37474	8.46003		-0.93432	3.06762
20	0.102937		0.0103572	0.000545702	0.00552705		0.000931121	5.50177e-05		0.00958889	0.000434097	0.00573875		0.000900233	0.000241088		0.237884	0.142845	1.51462			0.000384805					-9.30924	-1.35228	2.5651		-0.374261	2.25455
30	0.093545		0.0104328	0.000564173	0.00596814		0.000962449	6.01084e-05		0.0107714	0.000468876	0.00529422		0.000944825	0.000240848		0.103221	0.180116				0.000932809					3.51631	-0.989787	-6.99964		-0.183047	1.87723
45	0.139383		0.00972043	0.000621725	0.00622367		0.000977602	6.54083e-05		0.0106899	0.000469137	0.00671962		0.00100769	0.000252817		0.0386666	0.213384	1.94689			0.000911805					32.6166	-5.13362	16.6855		1.01211	6.30511
60	0.123111		0.010332	0.000689564	0.00644515		0.0017783	7.46796e-05		0.00977265	0.000562324	0.00650972		0.00170807	0.000259866		0.185073	0.211007	0.836728			0.000746783					-10.5147	-2.39201	1.21392		-1.32036	3.48138
90	0.180572		0.00966067	0.000845339	0.00522147		0.00186934	7.14088e-05		0.0108197	0.000619315	0.00629123		0.00177969	0.000286139		0.201065	0.238855	1.34876			0.000367874					-40.0909	7.81852	-37.0044		3.101	-7.42782
120	0.253225		0.00954326	0.000883944	0.007285		0.00201115	6.95771e-05		0.00863045	0.000769356	0.00892917		0.00204465	0.000307257		0.107164	0.252443	0.776339			0.000997178					7.04203	0.884019	-12.6843		-0.258486	-1.83364
180	0.068313		0.00777063	0.000967749	0.00798684		0.0022373	6.94529e-05		0.00793768	0.000987321	0.00934638		0.00228172	0.000336889		0.0921448	0.0423749	0.0109714			0.00241253					1.25128	0.146605	10.1835		0.33273	2.00321
206	0.0707107		0.00722724	0.000462222	0.00197075		0.000122463	9.4752e-05		0.00469233	0.000239557	0.00934725		3.06158e-05	7.38744e-05												-19.507	-1.71349	56.7648		-0.706797	-0.16066
