# Supplementary material for: Quantitative Analysis of Glycerol Accumulation, Glycolysis and Growth under Hyper Osmotic Stress
Source: PLoS Comput Biol. 2013 Jun 6;9(6):e1003084. doi: 10.1371/journal.pcbi.1003084 (PMC3677637; doi:10.1371/journal.pcbi.1003084)
Supplement: Dataset S5 — Intracellular glycerol quantification by enzyme assay in different strains for different stresses added at t = 0. (XLS) [file pcbi.1003084.s005.xls]

## Sheet: Readme
This file contains data from enzyme assay quantifications of intracellular glycerol in different strains, media and stresses
Data is NOT processed as HPLC data and has not been used for fitting but refers to the Preliminary Dataset mentioned in the main text.
Processing this data as HPLC data has been processed results in comparable values. To do this, volume differences between sampling volume and contained cell volume need to be accounted for and units should be converted to M instead of M/OD
Strain-IDs used:
115	fps1-Δ1
202	wild type (W303)
444	hog1Δ
689	MATalpha wildtype
690	gpd1Δ in MATalpha wildtype
691	gpd2Δ in MATalpha wildtype
737	gpd2Δ
1064	gpd1Δ
1584	pfk26Δ
1585	pfk27Δ
1586	pfk26/27Δ
2293	stl1Δ

## Sheet: wt 202 0.4M NaCl
enzymatic assay						Measurement:					context:
						wild type (0.4M NaCl)	OD (avg)	intra (avg)	SD			wild type (0.4M NaCl)	wild type (0.8M NaCl)	pfk26∆27∆ (0.4M NaCl)	pfk26∆27∆ (0.8M NaCl)
medium:						0		0.141558	0.223171		0	0.141558	0.134354	0.048571	0.0729463
YPD						5		0.26106	0.0586912		5	0.26106	0.0566574	0.278103	0.0799801
						10		0.365881	0.0754154		10	0.365881	0.152549	0.16068	0.0240431
strain:						15		0.364736	0.0635921		15	0.364736	0.194781	0.0524282	0.122694
wt 202						20		0.484762	0.0978316		20	0.484762	0.152831	0.235588	0.118473
						25		0.755694	0.142437		25	0.755694	0.368142	0.219402	0.170859
stress:						30		0.970569	0.154022		30	0.970569	0.494065	0.275449	0.152558
0.4 M NaCl						40		1.24381	0.0996538		40	1.24381	0.333365	0.44097	0.235129
						60		1.47614	0.184275		60	1.47614	0.690173	0.705971	0.281933
unit:						90		1.44398	0.0450505		90	1.44398	1.13789	1.05731	0.446932
mM/OD	min					120		1.31776	0.0251268		120	1.31776	1.63695	1.04489	1.04832
						180		1.08341			180	1.08341	1.84666	0.757199	1.20193
comments:
the intra and total come from different samplings:
the time points are different and the overall number of samples
the extra and total might come from the same sampling
	wild type	pfk26∆	pfk27∆
0	0.198845	0.241552	0.327401
1	0.381417	0.225955	0.471706
2	0.301859	0.355796	0.356195
5	0.340746	0.566153	0.542558
10	0.270108	0.562687	0.657335
20	0.469353	0.856629	0.798507
30	0.600309	0.938084	0.776734
source: 051028 pfk26d and pfk27d.xls
	wild type	hog1∆
0	0.141558	0
5	0.26106	0.0362351
10	0.365881	0.000539238
15	0.364736	0.0865104
20	0.484762	0.0490674
25	0.755694	0.109199
30	0.970569	0.216217
40	1.24381	0.26674
60	1.47614	0.345863
90	1.44398	0.3177
120	1.31776	0.388016
sources:
Embedded_ELN_ExcelWorkbook20098 rescued.xls
A and B Bodil intra.xls - missing file
C and D Bodil intra.xls - missing file

## Sheet: wt 202 0.8M NaCl
enzymatic assay			measurement:															context:
				OD 600	wild type	intra (avg)	SD		OD 600	wild type	extra			OD 600	wild type	total
medium:			0	0.848	0.113932	0.134354	0.0343573	0	0.848	2.4376	2.87453		0	0.848	2.38018	2.80682			wild type (0.4M NaCl)	wild type (0.8M NaCl)	pfk26∆27∆ (0.4M NaCl)	pfk26∆27∆ (0.8M NaCl)
YPD			5	0.882667	0.0500096	0.0566574	0.0481703	5	0.882667	2.04446	2.31623		5	0.882667	2.1117	2.39241		0	0.141558	0.134354	0.048571	0.0729463
			10	0.812	0.12387	0.152549	0.145757	10	0.812	2.03058	2.50072		10	0.812	2.26386	2.788		5	0.26106	0.0566574	0.278103	0.0799801
strain:			15	0.789333	0.153748	0.194781	0.0711115	15	0.789333	2.08627	2.64308		15	0.789333	2.22103	2.81381		10	0.365881	0.152549	0.16068	0.0240431
wt 202			20	0.785333	0.120023	0.152831	0.031924	20	0.785333	2.03459	2.59073		20	0.785333	2.28629	2.91123		15	0.364736	0.194781	0.0524282	0.122694
			25	0.782667	0.288132	0.368142	0.0709152	25	0.782667	2.12324	2.71283		25	0.782667	2.36401	3.02046		20	0.484762	0.152831	0.235588	0.118473
stress:			30	0.786667	0.388664	0.494065	0.0192924	30	0.786667	2.48677	3.16115		30	0.786667	2.60484	3.31124		25	0.755694	0.368142	0.219402	0.170859
0.8M NaCl			40	0.792	0.264025	0.333365	0.0566057	40	0.792	2.25023	2.84119		40	0.792	2.54744	3.21646		30	0.970569	0.494065	0.275449	0.152558
			60	0.797333	0.550298	0.690173	0.11843	60	0.797333	2.60472	3.26679		60	0.797333	3.09897	3.88667		40	1.24381	0.333365	0.44097	0.235129
unit:			90	0.884	1.0059	1.13789	0.187832	90	0.884	3.05459	3.45542		90	0.884	4.57218	5.17215		60	1.47614	0.690173	0.705971	0.281933
mM/OD	min		120	0.889333	1.45579	1.63695	0.106353	120	0.889333	2.82462	3.17611		120	0.889333	4.45817	5.01293		90	1.44398	1.13789	1.05731	0.446932
			180	1.012	1.86882	1.84666	0.0144079	180	1.012	3.6939	3.65009		180	1.012	6.24122	6.16722		120	1.31776	1.63695	1.04489	1.04832
																		180	1.08341	1.84666	0.757199	1.20193
	wild type (0.8 NaCl)	pfk26∆27∆ (0.8 NaCl)
0	2.80682	2.04079
5	2.39241	1.76708
10	2.788	1.87917
15	2.81381	1.88606
20	2.91123	1.80287
25	3.02046	1.89584
30	3.31124	2.11689
40	3.21646	1.30235
60	3.88667	1.22201
90	5.17215	1.60342
120	5.01293	3.3925
180	6.16722	4.64569
source: total wt and pfk26d27d (0.8 NaCl) plus pfk26d27d.xls
	wild type (0.8 NaCl)	pfk26∆27∆ (0.8 NaCl)
0	2.87453	2.00092
5	2.31623	1.67488
10	2.50072	1.77591
15	2.64308	1.85953
20	2.59073	1.81159
25	2.71283	1.79866
30	3.16115	1.77703
40	2.84119	1.71114
60	3.26679	1.71873
90	3.45542	1.98865
120	3.17611	2.10153
180	3.65009	2.4442
source: extra wt and pfk26d27d (0.8 NaCl).xls

## Sheet: 1586 0.4M NaCl
enzymatic assay			measurement:															context:
				OD 600	pfk26∆27∆	intra (avg)	SD		OD 600	pfk26∆27∆	extra			OD 600	pfk26∆27∆	total			wild type (0.4M NaCl)	wild type (0.8M NaCl)	pfk26∆27∆ (0.4M NaCl)	pfk26∆27∆ (0.8M NaCl)
medium:			0	0.84	0.0407997	0.048571	0.0605844	0	0.84	1.81834	2.16469		0	0.84	1.72256	2.05067		0	0.141558	0.134354	0.048571	0.0729463
YPD			5	0.724	0.201346	0.278103	0.056257	5	0.724	1.65585	2.28709		5	0.724	1.63035	2.25187		5	0.26106	0.0566574	0.278103	0.0799801
			10	0.81	0.130151	0.16068	0.00403896	10	0.81	1.7858	2.20469		10	0.81	1.6583	2.04729		10	0.365881	0.152549	0.16068	0.0240431
stress:			15	0.714	0.0374337	0.0524282	0.206997	15	0.714	1.69349	2.37184		15	0.714	1.63035	2.28341		15	0.364736	0.194781	0.0524282	0.122694
0.4 M NaCl			20	0.804	0.189412	0.235588	0.0463038	20	0.804	1.57538	1.95942		20	0.804	1.73368	2.15632		20	0.484762	0.152831	0.235588	0.118473
			25	0.788	0.172889	0.219402	0.121025	25	0.788	1.6989	2.15596		25	0.788	1.70961	2.16955		25	0.755694	0.368142	0.219402	0.170859
strain:			30	0.798	0.219808	0.275449	0.00822217	30	0.798	1.74694	2.18915		30	0.798	1.77203	2.22059		30	0.970569	0.494065	0.275449	0.152558
pfk26d27d 1586			40	0.894	0.394227	0.44097	0.0434188	40	0.894	1.55579	1.74026		40	0.894	1.96614	2.19926		40	1.24381	0.333365	0.44097	0.235129
			60	0.928	0.655141	0.705971	0.0774615	60	0.928	1.94778	2.0989		60	0.928	2.55426	2.75244		60	1.47614	0.690173	0.705971	0.281933
unit:			90	1.044	1.10384	1.05731	0.0597189	90	1.044	2.17789	2.0861		90	1.044	2.91845	2.79545		90	1.44398	1.13789	1.05731	0.446932
mM/OD	min		120	1.098	1.14729	1.04489	0	120	1.098	2.18115	1.98648		120	1.098	3.41093	3.10649		120	1.31776	1.63695	1.04489	1.04832
			180	1.518	1.14943	0.757199	0.100541	180	1.518	1.83272	1.20733		180	1.518	3.7308	2.45771		180	1.08341	1.84666	0.757199	1.20193
	intra pfk26∆27∆ (0.4M)	extra pfk26∆27∆ (0.4M)	total pfk26∆27∆ (0.4M)
0	0.048571	2.16469	2.05067
5	0.278103	2.28709	2.25187
10	0.16068	2.20469	2.04729
15	0.0524282	2.37184	2.28341
20	0.235588	1.95942	2.15632
25	0.219402	2.15596	2.16955
30	0.275449	2.18915	2.22059
40	0.44097	1.74026	2.19926
60	0.705971	2.0989	2.75244
90	1.05731	2.0861	2.79545
120	1.04489	1.98648	3.10649
180	0.757199	1.20733	2.45771
source: intra total extra pfk26d27d (0.4 NaCl).xls

## Sheet: 1586 0.8 M NaCl
enzymatic assay			measurement:															context:
				OD 600	pfk26∆27∆	intra (avg)	SD		OD 600	pfk26∆27∆	extra			OD 600	pfk26∆27∆	total			wild type (0.4M NaCl)	wild type (0.8M NaCl)	pfk26∆27∆ (0.4M NaCl)	pfk26∆27∆ (0.8M NaCl)
medium:			0	0.824	0.0601077	0.0729463	0.0401224	0	0.824	1.64876	2.00092		0	0.824	1.68161	2.04079		0	0.141558	0.134354	0.048571	0.0729463
YPD			5	0.784	0.0627044	0.0799801	0.00272016	5	0.784	1.3131	1.67488		5	0.784	1.38539	1.76708		5	0.26106	0.0566574	0.278103	0.0799801
			10	0.78	0.0187536	0.0240431	0.0352261	10	0.78	1.38521	1.77591		10	0.78	1.46576	1.87917		10	0.365881	0.152549	0.16068	0.0240431
stress:			15	0.776	0.0952106	0.122694	0.00272016	15	0.776	1.44299	1.85953		15	0.776	1.46358	1.88606		15	0.364736	0.194781	0.0524282	0.122694
0.8M NaCl			20	0.828	0.0980958	0.118473	0.0190412	20	0.828	1.5	1.81159		20	0.828	1.49278	1.80287		20	0.484762	0.152831	0.235588	0.118473
			25	0.752	0.128486	0.170859	0.0244815	25	0.752	1.35259	1.79866		25	0.752	1.42567	1.89584		25	0.755694	0.368142	0.219402	0.170859
strain:			30	0.73	0.111368	0.152558	0.0378103	30	0.73	1.29723	1.77703		30	0.73	1.54533	2.11689		30	0.970569	0.494065	0.275449	0.152558
pfk26d27d 1586			40	0.78	0.183401	0.235129	0.049915	40	0.78	1.33469	1.71114		40	0.78	1.01584	1.30235		40	1.24381	0.333365	0.44097	0.235129
			60	0.818	0.230621	0.281933	0.050323	60	0.818	1.40592	1.71873		60	0.818	0.999604	1.22201		60	1.47614	0.690173	0.705971	0.281933
unit:			90	0.856	0.382574	0.446932	0.102822	90	0.856	1.70228	1.98865		90	0.856	1.37253	1.60342		90	1.44398	1.13789	1.05731	0.446932
mM/OD	min		120	0.864	0.905751	1.04832	0.296498	120	0.864	1.81572	2.10153		120	0.864	2.93112	3.3925		120	1.31776	1.63695	1.04489	1.04832
			180	0.868	1.04328	1.20193	0.384903	180	0.868	2.12156	2.4442		180	0.868	4.03246	4.64569		180	1.08341	1.84666	0.757199	1.20193
	wild type (0.8 NaCl)	pfk26∆27∆ (0.8 NaCl)
0	2.80682	2.04079
5	2.39241	1.76708
10	2.788	1.87917
15	2.81381	1.88606
20	2.91123	1.80287
25	3.02046	1.89584
30	3.31124	2.11689
40	3.21646	1.30235
60	3.88667	1.22201
90	5.17215	1.60342
120	5.01293	3.3925
180	6.16722	4.64569
source: total wt and pfk26d27d (0.8 NaCl) plus pfk26d27d.xls
	wild type (0.8 NaCl)	pfk26∆27∆ (0.8 NaCl)
0	2.87453	2.00092
5	2.31623	1.67488
10	2.50072	1.77591
15	2.64308	1.85953
20	2.59073	1.81159
25	2.71283	1.79866
30	3.16115	1.77703
40	2.84119	1.71114
60	3.26679	1.71873
90	3.45542	1.98865
120	3.17611	2.10153
180	3.65009	2.4442
source: extra wt and pfk26d27d (0.8 NaCl).xls

## Sheet: pfk26D 0.5M NaCl
enzymatic assay					measurement:															combination:
						OD 600	pfk26∆/1	intra			OD 600	pfk26∆/2	intra			OD 600	pfk26∆/3	intra			pfk26∆/1	pfk26∆/2	pfk26∆/3	pfk26∆/avg	standard deviation
medium:					0	0.7	-0.0444594	-0.0635135		0	0.7	-0.0308892	-0.0441274		0	0.7	0.0727134	0.103876		0	-0.0635135	-0.0441274	0.103876	-0.00125485	0.0915608
YPD					1	0.704	-0.0434098	-0.0616617		1	0.704	-0.0509822	-0.0724178		1	0.704	0.145496	0.206671		1	-0.0616617	-0.0724178	0.206671	0.024197	0.158118
					2	0.708	0.0847953	0.119767		2	0.708	-0.0131204	-0.0185316		2	0.708	0.210945	0.297945		2	0.119767	-0.0185316	0.297945	0.13306	0.158657
stress:					5	0.72	0.103089	0.143179		5	0.72	0.00217424	0.00301978		5	0.72	0.161201	0.22389		5	0.143179	0.00301978	0.22389	0.123363	0.111761
0.5 M NaCl					10	0.74	0.0900435	0.12168		10	0.74	0.065677	0.0887527		10	0.74	0.162792	0.21999		10	0.12168	0.0887527	0.21999	0.143474	0.0682789
					15	0.76	0.167042	0.219791		15	0.76	0.145449	0.19138		15	0.76	0.201882	0.265634		15	0.219791	0.19138	0.265634	0.225602	0.0374663
strain number:					20	0.78	0.310391	0.397938		20	0.78	0.22717	0.291244		20	0.78	0.296527	0.380163		20	0.397938	0.291244	0.380163	0.356448	0.0571634
1584					30	0.82	0.520918	0.635265		30	0.82	0.373819	0.455877		30	0.82	0.441885	0.538884		30	0.635265	0.455877	0.538884	0.543342	0.0897773
					40	0.86	0.756335	0.87946		40	0.86	0.476758	0.55437		40	0.86	0.662792	0.770689		40	0.87946	0.55437	0.770689	0.734839	0.165483
unit:					50	0.9	0.993702	1.10411		50	0.9	0.977358	1.08595		50	0.9	0.610765	0.678628		50	1.10411	1.08595	0.678628	0.956232	0.240583
mM/OD	min				60	0.94	1.00637	1.07061		60	0.94	1.13615	1.20867		60	0.94	0.845302	0.899258		60	1.07061	1.20867	0.899258	1.05951	0.155006
comments:
	wild type	pfk26∆	pfk27∆
0	0.198845	0.241552	0.327401
1	0.381417	0.225955	0.471706
2	0.301859	0.355796	0.356195
5	0.340746	0.566153	0.542558
10	0.270108	0.562687	0.657335
20	0.469353	0.856629	0.798507
30	0.600309	0.938084	0.776734
source: 051028 pfk26d and pfk27d.xls

## Sheet: pfk27D 0.5 M NaCl
enzymatic assay				measurement:																					context:
					OD 600	pfk27∆/1	intra			OD 600	pfk27∆/2	intra			OD 600	pfk27∆/3	intra			pfk27∆/1	pfk27∆/2	pfk27∆/3	pfk27∆/4			wild type	pfk26∆	pfk27∆
medium:				0	0.7	0.142603	0.203718		0	0.7	0.138564	0.197948		0	0.7	0.0242636	0.0346623		0	0.203718	0.197948	0.0346623	0.0731087		0	0.198845	0.241552	0.327401
YPD				1	0.703	0.176491	0.251054		1	0.703	0.152667	0.217164		1	0.703	0.11316	0.160967		1	0.251054	0.217164	0.160967	0.0727967		1	0.381417	0.225955	0.471706
				2	0.706	0.202506	0.286835		2	0.706	0.14849	0.210326		2	0.706	0.148231	0.209958		2	0.286835	0.210326	0.209958	0.103553		2	0.301859	0.355796	0.356195
stress:				5	0.715	0.0833162	0.116526		5	0.715	0.166016	0.232191		5	0.715	0.145794	0.203907		5	0.116526	0.232191	0.203907	0.0899503		5	0.340746	0.566153	0.542558
0.5 M NaCl				10	0.73	0.255562	0.350085		10	0.73	0.265078	0.363121		10	0.73	0.10765	0.147466		10	0.350085	0.363121	0.147466	0.211474		10	0.270108	0.562687	0.657335
				15	0.745	0.287191	0.385491		15	0.745	0.210652	0.282755		15	0.745	0.245921	0.330095		15	0.385491	0.282755	0.330095	0.226274		20	0.469353	0.856629	0.798507
strain number:				20	0.76	0.334086	0.439587		20	0.76	0.308071	0.405357		20	0.76	0.507947	0.668351		20	0.439587	0.405357	0.668351	0.529494		30	0.600309	0.938084	0.776734
1585				30	0.79	0.319778	0.404783		30	0.79	0.436708	0.552795		30	0.79	0.161263	0.20413		30	0.404783	0.552795	0.20413	0.213385
				40	0.82	0.486548	0.593351		40	0.82	0.663244	0.808834		40	0.82	0.756516	0.922581		40	0.593351	0.808834	0.922581	0.583397
unit:				50	0.85	0.718217	0.844962		50	0.85	0.603615	0.710135		50	0.85	0.933884	1.09869		50	0.844962	0.710135	1.09869	0.958827
mM/OD	min			60	0.88	0.760115	0.863767		60	0.88	0.91107	1.03531		60	0.88	0.577453	0.656196		60	0.863767	1.03531	0.656196	0.922407
comments:
the first two runs (1 and 2) look better than the other two (3 and 4)
thus it might be worth to disregard 3 and 4
source: 051028 pfk26d and pfk27d.xls

## Sheet: wt 689 0.5 M NaCl
enzymatic assay			measurements:
				OD 600	wt/1	intra			OD 610	wt1	extra			OD 610	wt1	total
medium:			0	0.7	0.118916	0.16988		0	0.768	1.74907	2.27743		0	0.768	2.13272	2.77698
YPD			1	0.7033	0.152831	0.217306		10	0.744	1.47075	1.97681		10	0.744	2.00766	2.69846
			2	0.7066	0.164751	0.23316		15	0.76	1.58078	2.07998		15	0.76	1.94793	2.56307
stress:			5	0.7165	0.163332	0.227958		20	0.764	1.40254	1.83578		20	0.764	2.04288	2.67393
0.5 M NaCl			10	0.733	0.216972	0.296005		30	0.776	1.48867	1.91839		30	0.776	2.56457	3.30486
			15	0.7495	0.367036	0.489707		40	0.772	1.77645	2.3011		40	0.772	2.95457	3.82716
strain number:			20	0.766	0.420534	0.548999		60	0.82	2.38935	2.91384		60	0.82	3.44206	4.19764
689 wt			30	0.799	0.565915	0.708279		90	0.992	2.82997	2.85279		90	0.992	4.11536	4.14855
			40	0.832	0.955868	1.14888		120	1.1	3.41847	3.1077		120	1.1	5.9122	5.37473
unit:			50	0.865	1.14361	1.32209		180	1.428	5.87404	4.11347		180	1.428	7.8244	5.47927
mM/OD	min		60	0.9	1.11806	1.24229
									OD 610	wt2	extra			OD 610	wt2	total
comments:				OD 600	wt/2	intra		0	0.768	2.14638	2.79476		0	0.768	2.38183	3.10134
			0	0.7	0.0837945	0.119706		10	0.804	1.73114	2.15316		10	0.804	1.96835	2.4482
			1	0.7033	0.0967078	0.137506		15	0.736	1.57082	2.13427		15	0.736	1.90046	2.58215
			2	0.7066	0.199163	0.281861		20	0.744	1.89744	2.55032		20	0.744	2.20419	2.96262
			5	0.7165	0.168015	0.234494		30	0.8	1.60817	2.01021		30	0.8	2.50281	3.12851
			10	0.733	0.235561	0.321366		40	0.8	1.94025	2.42532		40	0.8	3.02705	3.78382
			15	0.7495	0.238541	0.318267		60	0.88	2.20065	2.50074		60	0.88	2.03267	2.30985
			20	0.766	0.307862	0.401908		90	0.996	2.90764	2.91932		90	0.996	4.82083	4.84019
			30	0.799	0.475096	0.594613		120	1.08	4.41125	4.08449		120	1.08	5.79581	5.36649
			40	0.832	0.718107	0.863109		180	1.416	6.36097	4.49221		180	1.416	8.3124	5.87034
			50	0.865	0.732368	0.846669
			60	0.9	0.930112	1.03346			OD 610	wt3	extra			OD 610	wt3	total
								0	0.768	1.16256	1.51375		0	0.768	1.96937	2.56429
				wt/3	intra			10	0.788	1.60219	2.03324		10	0.788	1.91016	2.42406
			0		0.179387			15	0.8	1.58775	1.98469		15	0.8	2.02093	2.52616
			1		0.158379			20	0.808	1.54195	1.90835		20	0.808	2.34099	2.89727
			2		0.230878			30	0.812	1.75056	2.15586		30	0.812	2.66003	3.2759
			5		0.309377			40	0.828	2.13144	2.5742		40	0.828	2.99132	3.61271
			10		0.368483			60	0.884	2.59348	2.9338		60	0.884	3.79837	4.29679
			15		0.365725			90	1.004	3.48718	3.47329		90	1.004	4.97192	4.95212
			20		0.57335			120	1.072	4.62733	4.31654		120	1.072	6.43287	6.00082
			30		0.7703			180	1.532	5.88598	3.84203		180	1.532	8.01225	5.22993
			40		0.99653
			50		1.15143
			60		1.09612
Plots: (numbers are from above)
	wt/1	wt/2	wt/3
0	0.16988	0.119706	0.179387
1	0.217306	0.137506	0.158379
2	0.23316	0.281861	0.230878
5	0.227958	0.234494	0.309377
10	0.296005	0.321366	0.368483
15	0.489707	0.318267	0.365725
20	0.548999	0.401908	0.57335
30	0.708279	0.594613	0.7703
40	1.14888	0.863109	0.99653
50	1.32209	0.846669	1.15143
60	1.24229	1.03346	1.09612
	wild type (1)	wild type (2)	wild type (3)
0	2.27743	2.79476	1.51375
10	1.97681	2.15316	2.03324
15	2.07998	2.13427	1.98469
20	1.83578	2.55032	1.90835
30	1.91839	2.01021	2.15586
40	2.3011	2.42532	2.5742
60	2.91384	2.50074	2.9338
90	2.85279	2.91932	3.47329
120	3.1077	4.08449	4.31654
180	4.11347	4.49221	3.84203
	wild type (1)	wild type (2)	wild type (3)
0	2.77698	3.10134	2.56429
10	2.69846	2.4482	2.42406
15	2.56307	2.58215	2.52616
20	2.67393	2.96262	2.89727
30	3.30486	3.12851	3.2759
40	3.82716	3.78382	3.61271
60	4.19764	5.3067	4.29679
90	4.14855	4.84019	4.95212
120	5.37473	5.36649	6.00082
180	5.47927	5.87034	5.22993

## Sheet: gpd1D 1064
enzymatic assay				measurement:
					OD 600	1064/1	intra			OD 600	1064/2	intra			OD 600	1064/3	intra			OD 600	1064 (different experiment)			1064
medium:				0	0.7	0.0488122	0.0697317		0	0.7	0.029086	0.0415514		0	0.7	0.0817533	0.11679		0	0.7	0.0994532	0.142076		time	OD	total 0mM	mM/OD
YPD				1	0.703	0.0787294	0.111991		1	0.703	0.100034	0.142296		1	0.703	0.0466871	0.0664112		1	0.703	0.145785	0.207375		0	0.59	1.02397	1.73555	0.116184
				2	0.706	0.0918738	0.130133		2	0.706	0.0742779	0.10521		2	0.706	0.0970438	0.137456		2	0.706	0.0906796	0.128441		1	0.55	0.970586	1.7647	0.0569183
stress:				5	0.715	0.0996782	0.13941		5	0.715	0.0926945	0.129643		5	0.715	0.0937139	0.131068		5	0.715	0.0978908	0.13691		2	0.55	0.942068	1.71285	0.0279804
0.5 M NaCl				10	0.73	0.0875608	0.119946		10	0.73	0.124431	0.170453		10	0.73	0.0703364	0.0963512		10	0.73	0.138273	0.189415		5	0.6	0.994971	1.65829	0.0291385
				15	0.745	0.112412	0.150888		15	0.745	0.146381	0.196485		15	0.745	0.113626	0.152518		15	0.745	0.117	0.157047		10	0.62	1.01722	1.64068	0.0316474
strain number:				20	0.76	0.0765386	0.100709		20	0.76	0.21862	0.287658		20	0.76	0.135168	0.177853		20	0.76	0.134247	0.17664		20	0.64	1.05821	1.65345	0.0501844
1064				30	0.79	0.157938	0.199921		30	0.79	0.151886	0.192261		30	0.79	0.153585	0.194411		30	0.79	0.152875	0.193513		30	0.63	1.13811	1.80653	0.0327026
				40	0.82	0.211337	0.257728		40	0.82	0.196126	0.239179		40	0.82	0.184709	0.225255		40	0.82	0.13016	0.158732		40	0.63	1.15843	1.83879	0.0248332
unit:				50	0.85	0.254125	0.29897		50	0.85	0.292219	0.343787		50	0.85	0.221747	0.260878		50	0.85	0.222823	0.262145		50	0.7	1.17242	1.67488	0.0282326
mM/OD	min			60	0.88	0.315944	0.359028		60	0.88	0.38668	0.439409		60	0.88	0.310296	0.352609		60	0.88	0.299802	0.340684		60	0.75	1.26231	1.68308	0.0391801
comments:
Plot (numbers from above):
	gpd1∆/1	gpd1∆/2	gpd1∆/3	gpd1∆	standard deviation
0	0.0697317	0.0415514	0.11679	0.0760245	0.0380122
1	0.111991	0.142296	0.0664112	0.106899	0.0381977
2	0.130133	0.10521	0.137456	0.124266	0.0169047
5	0.13941	0.129643	0.131068	0.133374	0.00527604
10	0.119946	0.170453	0.0963512	0.128917	0.0378567
15	0.150888	0.196485	0.152518	0.16663	0.0258677
20	0.100709	0.287658	0.177853	0.18874	0.0939492
30	0.199921	0.192261	0.194411	0.195531	0.00395135
40	0.257728	0.239179	0.225255	0.240721	0.0162911
50	0.29897	0.343787	0.260878	0.301212	0.0414997
60	0.359028	0.439409	0.352609	0.383682	0.048368
	gpd2∆	gpd1∆
0	0.197189	0.142076
1	0.171046	0.207375
2	0.189555	0.128441
5	0.185825	0.13691
10	0.184394	0.189415
15	0.294655	0.157047
20	0.415113	0.17664
30	0.486445	0.193513
40	0.661165	0.158732
50	0.73221	0.262145
60	0.77294	0.340684
	gpd2∆	gpd1∆
0	1.42227	1.73555
1	1.29943	1.7647
2	1.48454	1.71285
5	1.46635	1.65829
10	1.29026	1.64068
20	1.80285	1.65345
30	2.19864	1.80653
40	2.3502	1.83879
50	2.38563	1.67488
60	2.72525	1.68308

## Sheet: gpd2D 737
enzymatic assay					Measurement:
						OD 600	737/1	intra			OD 600	737/2	intra			OD 600	737/3	intra		737						737
medium:					0	0.7	0.00814678	0.0116383		0	0.7	0.0908447	0.129778		0	0.7	0.0657596	0.0939423		time	OD	total 0,5mM	mM/OD			time	OD	intra 0,5mM	mM/OD
YPD					1	0.703	0.0985829	0.140232		1	0.703	0.0667517	0.0949526		1	0.703	0.0812783	0.115616		0	0.51	0.725356	1.42227	0.0205067		0	0.61	0.184292	0.302118	0.00818105
					2	0.706	0.106798	0.151272		2	0.706	0.134637	0.190704		2	0.706	0.119402	0.169125		1	0.47	0.610732	1.29943	0.0536053		1	0.66	0.174534	0.264446	0.0633823
stress:					5	0.715	0.103786	0.145155		5	0.715	0.130598	0.182655		5	0.715	0.127834	0.178789		2	0.45	0.668044	1.48454	0.199385		2	0.64	0.179413	0.280333	0.0474008
0.5 M NaCl					10	0.73	0.152735	0.209226		10	0.73	0.191681	0.262576		10	0.73	0.121811	0.166865		5	0.46	0.67452	1.46635	0.0414438		5	0.65	0.225108	0.34632	0.035483
					15	0.745	0.197303	0.264836		15	0.745	0.216695	0.290866		15	0.745	0.296981	0.398633		10	0.52	0.670938	1.29026	0.0671809		10	0.7	0.255411	0.364873	0.0401122
strain number:					20	0.76	0.4682	0.616053		20	0.76	0.326247	0.429273		20	0.76	0.306689	0.403539		20	0.5	0.901426	1.80285	0.0137095		20	0.71	0.403628	0.56849	0.178551
737					30	0.79	0.630109	0.797606		30	0.79	0.503401	0.637217		30	0.79	0.515306	0.652286		30	0.51	1.12131	2.19864	0.0157708		30	0.73	0.423349	0.57993	0.00600817
					40	0.82	0.837338	1.02114		40	0.82	0.676162	0.824588		40	0.82	0.6982	0.851464		40	0.56	1.31611	2.3502	0.0219067		40	0.76	0.360796	0.474732	0.0960592
unit:					50	0.85	1.09543	1.28875		50	0.85	0.854096	1.00482		50	0.85	0.846018	0.995315		50	0.62	1.47909	2.38563	0.0637304		50	0.77	0.334089	0.433882	0.0370244
mM/OD	min				60	0.88	1.11125	1.26278		60	0.88	0.966837	1.09868		60	0.88	0.989867	1.12485		60	0.64	1.74416	2.72525	0.0626462		60	0.84	0.493713	0.587753	0.086299
comments:
Plots (numbers from above or other sheets):
	gpd2∆/1	gpd2∆/2	gpd2∆/3	gpd2∆
0	0.0116383	0.129778	0.0939423	0.0784529	0.0605739
1	0.140232	0.0949526	0.115616	0.116934	0.0226682
2	0.151272	0.190704	0.169125	0.170367	0.0197454
5	0.145155	0.182655	0.178789	0.168866	0.0206254
10	0.209226	0.262576	0.166865	0.212889	0.0479609
15	0.264836	0.290866	0.398633	0.318111	0.0709376
20	0.616053	0.429273	0.403539	0.482955	0.115982
30	0.797606	0.637217	0.652286	0.695703	0.0885717
40	1.02114	0.824588	0.851464	0.899065	0.106574
50	1.28875	1.00482	0.995315	1.09629	0.166737
60	1.26278	1.09868	1.12485	1.1621	0.088167
	gpd2∆	gpd1∆
0	0.197189	0.142076
1	0.171046	0.207375
2	0.189555	0.128441
5	0.185825	0.13691
10	0.184394	0.189415
15	0.294655	0.157047
20	0.415113	0.17664
30	0.486445	0.193513
40	0.661165	0.158732
50	0.73221	0.262145
60	0.77294	0.340684
	gpd2∆	gpd1∆
0	1.42227	1.73555
1	1.29943	1.7647
2	1.48454	1.71285
5	1.46635	1.65829
10	1.29026	1.64068
20	1.80285	1.65345
30	2.19864	1.80653
40	2.3502	1.83879
50	2.38563	1.67488
60	2.72525	1.68308

[truncated: 6 more sheets: hog1d, wt 689 YNB 0.5M NaCl, gpd1D 690 YNB 0.5M NaCl, gpd2D 691 YNB 0.5M NaCl, gpd1D 1064 YNB, gpd2D 737 YNB]
