# Supplementary material for: Quantitative Analysis of Glycerol Accumulation, Glycolysis and Growth under Hyper Osmotic Stress
Source: PLoS Comput Biol. 2013 Jun 6;9(6):e1003084. doi: 10.1371/journal.pcbi.1003084 (PMC3677637; doi:10.1371/journal.pcbi.1003084)
Supplement: Dataset S6 — Intracellular trehalose quantification by enzyme assay in different strains, stress 0.4 M NaCl added at t = 0. (XLS) [file pcbi.1003084.s006.xls]

## Sheet: Readme
This file contains results of trehalose quantifications using enzyme assay in different strains
Data and has not been used for fitting but refers to the Preliminary Dataset mentioned in the main text.
Strain-IDs used:
202	wild type (W303)
642	gpd1Δgpd2Δ
737	gpd2Δ
1064	gpd1Δ
1559	ssk2Δssk22Δ
Calculation of glucose concentration from readout:
V= final volume (ml)
v= sample volume (ml)
MW= molecular weight of glucose (g/mol)
d= light path (cm)
ε= extinction coefficient of NADPH at 340 nm=6.3
V=1,51
MW= 180,16
ε=6.3
v=0,05
d=1
c=0.864xΔA

## Sheet: Trehalose
vs. Proteins						vs. OD610
	737	202	642	1064			737	1064	1559	202
0	0.000601279	0	0	0.00126427		0	0.00410959	0.0102941	0.00224416	0.00227368
10	0.000783529	0	0.00137216	0		10	0.00684932	0	0.00236712	0.0081
30	0.00193014	0.00333885	0.00158597	0.0044992		30	0.0105263	0.025	0.00756	0.010368
45	0.00124551	0.00223234	0.00837853	0.00557311		45	0.00967742	0.0391304	0.0505756	0.0100987
60	0.00235458	0.000581383	0.0057888	0.0115769		60	0.0132653	0.0458333	0.0733395	0.0123429
90	0.00121617	0.000789108	0.012112	0.00737723		90	0.00648148	0.0402062	0.00671068	0.00171089
120	0.00103123	0.00349296	0.0138142	0.00809579		120	0.00495868	0.0357798	0.00993982	0.0108973
180	0.00925883	0.00975498	0.0159082	0.011737		150	0.0241135	0.0385246	0.00902687	0.0265323
210	0.00992555	0.0120051	0.0196072	0.0109741		180	0.0435294	0.0520548	0.00945985	0.0308571
240	0.0136034	0.0143349	0.0179951	0.0196726		210	0.0416216	0.0410714	0.0102993	0.042048
1030	0.0900916	0.0604338	0.0384743	0.0928943		240	0.0447761	0.0638298	0.0265031
						1030	0.121709	0.162216	0.0934711	0.111168
vs. Proteins
	202	642
0	0	0
5	0	0.00028622
10	0	0.00137216
30	0.00333885	0.00158597
45	0.00223234	0.00837853
60	0.000581383	0.0057888
90	0.000789108	0.012112
120	0.00349296	0.0138142
180	0.00975498	0.0159082
210	0.0120051	0.0196072
240	0.0143349	0.0179951
270	0.0132514	0.020339
1030	0.0604338	0.0384743
OD 610	737	1064	202	1559
0	0.73	0.68	0.76	0.77
10	0.73	0.72	0.64	0.73
30	0.76	0.76	0.75	0.8
45	0.93	0.92	0.77	0.82
60	0.98	0.96	0.84	0.86
90	1.08	0.97	1.01	1.03
120	1.21	1.09	1.11	1.13
150	1.41	1.22	1.27	1.34
180	1.7	1.46	1.4	1.37
210	1.85	1.68	1.5	1.51
240	2.01	1.88	x	1.63
18h	4.33	3.52	4.5	3.91
								202	1559
							0	0.001728	0.001728
							10	0.005184	0.001728
							30	0.007776	0.006048
							45	0.007776	0.041472
							60	0.010368	0.063072
							90	0.001728	0.006912
							120	0.012096	0.011232
							150	0.033696	0.012096
							180	0.0432	0.01296
							210	0.063072	0.015552
							240	0.097632	0.0432
							1030	0.500256	0.365472
