# Supplementary material for: Quantitative Analysis of Glycerol Accumulation, Glycolysis and Growth under Hyper Osmotic Stress
Source: PLoS Comput Biol. 2013 Jun 6;9(6):e1003084. doi: 10.1371/journal.pcbi.1003084 (PMC3677637; doi:10.1371/journal.pcbi.1003084)
Supplement: Dataset S7 — Northern Blot results for CTT1, GRE2, STL1, 18S in different strains. (XLS) [file pcbi.1003084.s007.xls]

## Sheet: Readme
This file contains data from Northern Blot results of CTT1, GRE2 and STL1 in different strains
Data has not been used for fitting but refers to the Preliminary Dataset mentioned in the main text.
Strain-IDs used:
202	wild type (W303)
689	MATalpha wildtype
690	gpd1Δ in MATalpha wildtype
691	gpd2Δ in MATalpha wildtype
737	gpd2Δ
1064	gpd1Δ

## Sheet: CTT1
	wild type	gpd2∆	gpd1∆
0	0.101827	0.13639	0.086603
10	0.22633	0.373856	0.228633
20	0.642902	0.735261	0.468728
30	1	0.909502	0.620622
40	0.635425	1	0.980474
50	0.500192	0.936521	1
60	0.291392	0.857972	0.695518
90	0.160105	0.743986	0.422992
120	0.207533	0.485818	0.62722

## Sheet: GRE2
	wild type	gpd2∆	gpd1∆
0	0.0533957	0.0625108	0.0559684
10	0.162155	0.116427	0.0963433
20	0.246079	0.518355	0.260461
30	0.298252	0.69591	0.35257
40	0.597964	0.550841	0.311955
50	0.718818	0.703654	0.817369
60	0.260679	0.741683	0.73505
90	0.805393	0.889927	0.380111
120	1	1	1

## Sheet: STL1
	wild type	gpd2∆	gpd1∆
0	0.0475242	0.0157756	0.055331
10	0.202984	0.371337	0.258125
20	1	0.761993	1
30	0.554904	1	0.963682
40	0.0870613	0.373202	0.819087
50	0	0.177621	0.400012
60	0.000983421	0	0.0839501
90	0	0	0
120	0	0	0

## Sheet: 18S
loading control
wt			gpd2D			gpd1D
2917.38	34.1216		10133.3	80.9642		11473	96.7879
6162.14	72.0723		11564.5	92.3993		11270.1	95.0762
5658.4	66.1806		11467.6	91.6254		11799.1	99.5388
4818.74	56.3599		12064.1	96.3916		11853.7	100
6242.3	73.0099		12241.9	97.812		11182.2	94.3349
8520.63	99.6572		12515.8	100		10612.8	89.5316
8549.94	100		9351.06	74.7143		10843.3	91.4758
7583.85	88.7006		9979.2	79.7331		7276.69	61.3873
6877.26	80.4364		9186.96	73.4031		6351.65	53.5835
