# Supplementary material for: Quantitative Analysis of Glycerol Accumulation, Glycolysis and Growth under Hyper Osmotic Stress
Source: PubMed Central journal article supplement (PMC3677637; doi:10.1371/journal.pcbi.1003084), 2013-06-06

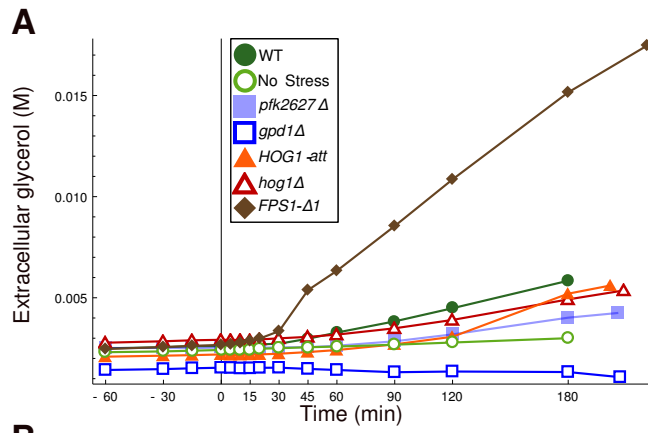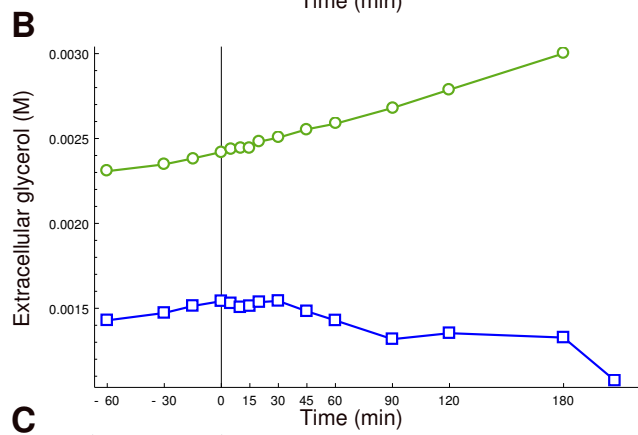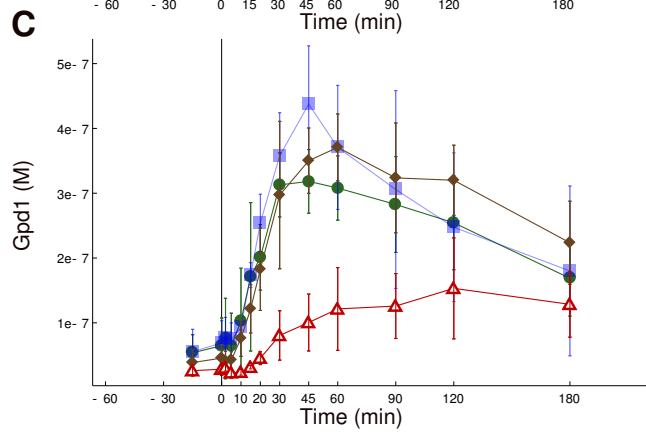

Supplement: pcbi.1003084.s015.pdf [file pcbi.1003084.s015.pdf]
