# Supplementary material for: Quantitative Analysis of Glycerol Accumulation, Glycolysis and Growth under Hyper Osmotic Stress
Source: PubMed Central journal article supplement (PMC3677637; doi:10.1371/journal.pcbi.1003084), 2013-06-06
Supplement: pcbi.1003084.s029.pdf [file pcbi.1003084.s029.pdf]

| Time (min) | Control |       | 0.4M NaCl |       |
|------------|---------|-------|-----------|-------|
|            | OD      | CD    | OD        | CD    |
| -60        | 0.42    | 7.64  | 0.544     | 10.76 |
| -30        | 0.544   | 11    | 0.692     | 14.16 |
| -15        | 0.608   | 12.8  | 0.84      | 15.81 |
| 0          | 0.75    | 13.67 | 0.94      | 17.94 |
| 5          | 0.7     | 13.14 | 0.972     | 16.74 |
| 10         | 0.715   | 13.94 | 0.916     | 17.42 |
| 15         | 0.755   | 13.57 | 0.96      | 18.2  |
| 20         | 0.845   | 14.78 | 0.968     | 18.24 |
| 30         | 0.89    | 14.9  | 0.964     | 20.45 |
| 45         | 1.01    | 17.84 | 1.132     | 22.51 |
| 60         | 1.08    | 19.76 | 1.175     | 23.81 |
| 90         | 1.36    | 25.5  | 1.365     | 27.93 |
| 120        | 1.73    | 27.6  | 1.655     | 29.31 |
| 180        | 2.2     | 29.76 | 2.16      | 30.87 |
