# Supplementary material for: Quantitative Analysis of Glycerol Accumulation, Glycolysis and Growth under Hyper Osmotic Stress
Source: PLOS journal article supplement (doi:10.1371/journal.pcbi.1003084), 2013-06-06
Supplement: S30 (10.1371/journal.pcbi.1003084.s030) [file journal.pcbi.1003084.s030]

301 Moved Permanently

# Moved Permanently

The document has moved here.

---

Apache Server at www.ploscompbiol.org Port 80
